# Supplementary material for: NTRK1-3 Fusions in Sarcomas: Prevalence, Significance, and Clinical Implications – A Systematic Review
Source: Research Square preprint supplement (doi:10.21203/rs.3.rs-6512957/v1), 2025-05-23
Supplement: Supplementary file 1 [file 202c02f2574279bfe9a23559.docx]

**Supplementary Table 1- Number of studies and patients based on type of sarcoma**

| Type of tumor | Number of studies | Number of patients |
| --- | --- | --- |
| - Infantile or Congenital fibrosarcoma | 13 | - Infantile or Congenital fibrosarcoma (23) |
| - Gastrointestinal stromal tumor | 3 | - Gastrointestinal stromal tumor (197) |
| - Congenital mesoblastic nephroma - Congenital / Infantile fibrosarcoma | 3 | - Congenital mesoblastic nephroma (19) - Congenital / Infantile fibrosarcoma (9) |
| - Congenital mesoblastic nephroma | 3 | - Congenital mesoblastic nephroma (27) |
| - Rhabdomyosarcoma | 2 | - Rhabdomyosarcoma (3) |
| - Lipofibromatosis-like neural tumor | 3 | - Lipofibromatosis-like neural tumor (16) |
| - Soft tissue sarcoma - Uterine sarcoma - Not mentioned | 1 | - Soft tissue sarcoma (1) - Uterine sarcoma (1) - Not mentioned (476) |
| - Dermatofibrosarcoma protuberans | 1 | - Dermatofibrosarcoma protuberans (1) |
| - Inflammatory myofibroblastic tumor | 1 | - Inflammatory myofibroblastic tumor (1) |
| - Not mentioned | 10 | - Not mentioned (4,464) |
| - Spindle cell sarcoma | 22 | - Spindle cell sarcoma (72) |
| - Osteosarcoma | 2 | - Osteosarcoma (132) |
| - Uterine sarcoma | 5 | - Uterine sarcoma (10) |
| - Adult type fibrosarcoma | 1 | - Adult type fibrosarcoma (2) |
| - Soft tissue sarcoma | 3 | - Soft tissue sarcoma (4) |
| - Malignant peripheral nerve sheath tumor | 1 | - Malignant peripheral nerve sheath tumor (1) |
| - Cardiac sarcoma | 1 | - Cardiac sarcoma (4) |
| - Mesenchymal tumor | 4 | - Mesenchymal tumor (11) |
| - Undifferentiated pleomorphic sarcoma | 2 | - Undifferentiated pleomorphic sarcoma (2) |
| - Cervical sarcoma | 2 | - Cervical sarcoma (2) |
| - Primary renal fibrosarcoma | 1 | - Primary renal fibrosarcoma (1) |
| - Ewing sarcoma | 1 | - Ewing sarcoma (1) |
| - Mesenchymal tumor - Infantile fibrosarcoma | 1 | - Mesenchymal tumor (4) - Infantile fibrosarcoma (2) |
| - Cervical sarcoma - Uterine adenosarcoma | 1 | - Cervical sarcoma (3) - Uterine adenosarcoma (19) |
| - Infantile fibrosarcoma - Spindle cell sarcoma - Lipofibromatosis-like neural tumor | 1 | - Infantile fibrosarcoma (3) - Spindle cell sarcoma (2) - Lipofibromatosis-like neural tumor (1) |
| - Soft tissue sarcoma - Bone sarcoma | 1 | - Soft tissue sarcoma (3,424) - Bone sarcoma (832) |
| - Soft tissue sarcoma - Infantile fibrosarcoma - Not mentioned | 1 | - Soft-tissue sarcoma (2) - Infantile fibrosarcoma (1) - Not Mentioned (96) |
| - Spindle cell sarcoma - Infantile fibrosarcoma | 2 | - Spindle cell sarcoma (14) - Infantile fibrosarcoma (20) |
| - Solitary fibrous tumor | 1 | - Solitary fibrous tumor (1) |
| - Congenital-infantile fibrosarcoma - Adult-type fibrosarcoma - Leiomyosarcoma - Storiform-pleomorphic variant of malignant fibrous histiocytoma - Monophasic synovial sarcoma - Malignant peripheral nerve sheath tumor - Dermatofibrosarcoma protuberans - Fibromatosis | 1 | - Congenital-infantile fibrosarcoma (10) - Adult-type fibrosarcoma (7) - Leiomyosarcoma (4) - Storiform-pleomorphic variant of malignant fibrous histiocytoma (4) - Monophasic synovial sarcoma (4) - Malignant peripheral nerve sheath tumor (3) - Dermatofibrosarcoma protuberans (4) - Fibromatosis (4) |
| - Desmoid - Hemangiopericytoma - Dermatofibrosarcoma protuberans - Congenital/infantile fibrosarcoma - Malignant fibrous histiocytoma - Leiomyosarcoma - Rhabdomyosarcoma (embryonal) - Rhabdomyosarcoma (alveolar) - Synovial sarcoma - Well-differentiated liposarcoma - Differentiated liposarcoma - Myxoid liposarcoma - Extraskeletal Ewing’s sarcoma - Primitive neuroectodermal tumor - Angiosarcoma - Extraskeletal myxoid chondrosarcoma - Clear cell sarcoma | 1 | - Desmoid (3) - Hemangiopericytoma (1) - Dermatofibrosarcoma protuberans (2) - Congenital/infantile fibrosarcoma (1) - Malignant fibrous histiocytoma (1) - Leiomyosarcoma (3) - Rhabdomyosarcoma (embryonal) (1) - Rhabdomyosarcoma (alveolar) (1) - Synovial sarcoma (3) - Well-differentiated liposarcoma (4) - Differentiated liposarcoma (1) - Myxoid liposarcoma (4) - Extraskeletal Ewing’s sarcoma (2) - Primitive neuroectodermal tumor (1) - Angiosarcoma (1) - Extraskeletal myxoid chondrosarcoma (1) - Clear cell sarcoma (1) |
| - Embryonal rhabdomyosarcoma - Infantile fibrosarcoma - Nodular fibrohistiocytic tumor - Angiomatoid fibrous histiocytoma | 1 | - Embryonal rhabdomyosarcoma (1) - Infantile fibrosarcoma (3) - Nodular fibrohistiocytic tumor (1) - Angiomatoid fibrous histiocytoma (1) |
| - Myopericytoma-like sarcoma - Infantile haemangiopericytoma-like sarcoma - Myofibroblastic sarcoma-like | 1 | - Myopericytoma-like sarcoma (2) - Infantile haemangiopericytoma-like sarcoma (1) - Myofibroblastic sarcoma-like (1) |
| - Infantile fibrosarcoma - Fibrosarcoma - Fibrosarcoma ex dermatofibrosarcoma protuberans - Neuroectodermal tumor - Inflammatory myofibroblastic tumor - Dendritic sarcoma | 1 | - Infantile fibrosarcoma (2) - Fibrosarcoma (1) - Fibrosarcoma ex dermatofibrosarcoma protuberans (1) - Neuroectodermal tumor (1) - Inflammatory myofibroblastic tumor (1) - Dendritic sarcoma (1) |
| - Bone sarcoma - Rhabdomyosarcoma - Ewing sarcoma - Soft tissue sarcoma - Soft tissue assorted - Fibromatosis - Angiosarcoma - Fibrosarcoma - Hemangioma - Hemangioendothelioma - Synovial sarcoma - Alveolar soft part sarcoma - Inflammatory myofibroblastic tumor - Dermatofibrosarcoma protuberans - Malignant peripheral nerve sheath tumor - Unknown sarcoma | 1 | - Bone sarcoma (63) - Rhabdomyosarcoma (66) - Ewing sarcoma (39) - Soft tissue sarcoma (37) - Soft tissue assorted (19) - Fibromatosis (18) - Angiosarcoma (5) - Fibrosarcoma (6) - Hemangioma (6) - Hemangioendothelioma (7) - Synovial sarcoma (10) - Alveolar soft part sarcoma (6) - Inflammatory myofibroblastic tumor (7) - Dermatofibrosarcoma protuberans (14) - Malignant peripheral nerve sheath tumor (11) - Unknown sarcoma (10) |
| - Lipofibromatosis-like neural tumor - Lipofibromatosis - Primitive myxoid mesenchymal tumor of infancy - Low-grade myofibroblastic sarcoma - Infantile fibrosarcoma - Desmoid fibromatosis - Fibrosarcomatous dermatofibrosarcoma protuberans - Spindle-cell rhabdomyosarcoma - Synovial sarcoma - Malignant peripheral nerve sheath tumor - Low-grade fibromyxoid sarcoma | 1 | - Lipofibromatosis-like neural tumor (5) - Lipofibromatosis (5) - Primitive myxoid mesenchymal tumor of infancy (10) - Low-grade myofibroblastic sarcoma (10) - Infantile fibrosarcoma (15) - Desmoid fibromatosis (15) - Fibrosarcomatous dermatofibrosarcoma protuberans (20) - Spindle-cell rhabdomyosarcoma (20) - Synovial sarcoma (20) - Malignant peripheral nerve sheath tumor (20) - Low-grade fibromyxoid sarcoma (20). |
| - Soft tissue sarcoma not otherwise specified - Dermatofibrosarcoma protuberans - Desmoid - Malignant Peripheral Nerve Sheath Tumor - Synovial sarcoma - Spindle cell rhabdomyosarcoma - Inflammatory Myofibroblastic tumor - BCOR rearranged sarcoma - Undifferentiated pleomorphic sarcoma - High grade sarcoma - Low-grade spindle cell lesion - Metanephric stromal tumor - Classic mesoblastic nephroma - Cellular mesoblastic nephroma - Clear cell sarcoma of the kidney | 1 | - Soft tissue sarcoma not otherwise specified (31) - Dermatofibrosarcoma protuberans (2) - Desmoid (5) - Malignant Peripheral Nerve Sheath Tumor (2) - Synovial sarcoma (2) - Spindle cell rhabdomyosarcoma (2) - Inflammatory Myofibroblastic Tumor (6) - BCOR rearranged sarcoma (1) - Undifferentiated pleomorphic sarcoma (1) - High grade sarcoma (4) - Low-grade spindle cell lesion (5) - Metanephric stromal tumor (1) - Classic mesoblastic nephroma (1) - Cellular mesoblastic nephroma (1) - Clear cell sarcoma of the kidney (1) |
| - Lipofibromatosis-like neural tumor - Infantile fibrosarcoma - Peripheral nerve sheath tumor - Spindle cell sarcoma | 1 | - Lipofibromatosis-like neural tumor (4) - Infantile fibrosarcoma (3) - Peripheral nerve sheath tumor (1) - Spindle cell sarcoma (2) |
| - Infantile fibrosarcoma - Low-grade spindle cell sarcoma - Unclassified tumor - Spindle and round cell sarcoma - Spindle cell sarcoma - Myxoid dermatofibrosarcoma protuberans | 1 | - Infantile fibrosarcoma (15) - Low-grade spindle cell sarcoma (5) - Unclassified tumor (4) - Spindle and round cell sarcoma (2) - Spindle cell sarcoma (1) - Myxoid dermatofibrosarcoma protuberans (1) |
| - Undifferentiated sarcoma - Infantile fibrosarcoma - Inflammatory myofibroblastic tumor | 1 | - Undifferentiated sarcoma (1) - Infantile fibrosarcoma (7) - Inflammatory myofibroblastic tumor (1) |
| - Inflammatory myofibroblastic-like tumor - Ewing sarcoma - Fibrosarcoma-like tumor - Lung spindle and epithelioid cell sarcoma - Uterine malignant peripheral nerve sheath tumor-like sarcoma | 1 | - Inflammatory myofibroblastic-like tumor (2) - Ewing sarcoma (1) - Fibrosarcoma-like tumor (1) - Lung spindle and epithelioid cell sarcoma (1) - Uterine malignant peripheral nerve sheath tumor-like sarcoma (1) |
| - Myxofibrosarcomas - Soft tissue leiomyosarcomas - Uterine leiomyosarcomas - Undifferentiated pleomorphic sarcomas - Synovial sarcomas - Myxoid liposarcomas - Atypical lipomatous tumors/well-differentiated liposarcomas - Dedifferentiated liposarcomas - Dermatofibrosarcoma protuberans - Low-grade fibromyxoid sarcomas - Angiosarcomas - Solitary fibrous tumor - Spindle cell sarcomas - Myxoinflammatory fibroblastic sarcoma - Pleomorphic liposarcoma - Alveolar soft part sarcomas - Spindle cell/pleomorphic sarcoma - Clear cell sarcoma - Extraskeletal myxoid chondrosarcomas - Embryonal rhabdomyosarcoma - Sclerosing epithelioid fibrosarcoma - Epithelioid sarcoma - Mesenchymal chondrosarcoma - Malignant peripheral nerve sheath tumor - Pleomorphic rhabdomyosarcoma - Infantile fibrosarcoma - Lipofibromatosis-like neural tumor | 1 | - Myxofibrosarcomas (116) - Soft tissue and uterine leiomyosarcomas (82) - Undifferentiated pleomorphic sarcomas (55) - Synovial sarcomas (45) - Myxoid liposarcomas (37) - Atypical lipomatous tumors/well-differentiated liposarcomas (34) - Dedifferentiated liposarcomas (34) - Dermatofibrosarcoma protuberans (19) - Low-grade fibromyxoid sarcomas (12) - Angiosarcomas (10) - Solitary fibrous tumor (8) - Spindle cell sarcomas (8) - Myxoinflammatory fibroblastic sarcoma (5) - Pleomorphic liposarcoma (4) - Alveolar soft part sarcomas (4) - Spindle cell/pleomorphic sarcoma (3) - Clear cell sarcoma (3) - Extraskeletal myxoid chondrosarcomas (2) - Embryonal rhabdomyosarcoma (2) - Sclerosing epithelioid fibrosarcoma (2) - Epithelioid sarcoma (1) - Mesenchymal chondrosarcoma (1) - Malignant peripheral nerve sheath tumor (1) - Pleomorphic rhabdomyosarcoma (1) - Infantile fibrosarcoma (1) - Lipofibromatosis-like neural tumor (1) |
| - Ewing sarcoma - Osteosarcoma - Unspecified high-grade malignant neoplasm - Lipofibromatosis-like features - Malignant solitary fibrous tumor | 1 | - Ewing sarcoma (2) - Osteosarcoma (1) - Unspecified high-grade malignant neoplasm (1) - Lipofibromatosis-like features (1) - Malignant solitary fibrous tumor (1) |
| - Conventional chondrosarcoma - Dedifferentiated chondrosarcoma - Clear cell chondrosarcoma - Mesenchymal chondrosarcoma - Osteosarcoma - Angiosarcoma - Ewing sarcoma | 1 | - Conventional chondrosarcoma (137) - Dedifferentiated chondrosarcoma (36) - Clear cell chondrosarcoma (20) - Mesenchymal chondrosarcoma (19) - Osteosarcoma (123) - Angiosarcoma (26) - Ewing sarcoma (20) |
| - Chondroid tenosynovial giant cell tumor - Chondroid neoplasm of synovium - Atypical chondroid neoplasm - Giant cell-rich lesion with chondroid stroma | 1 | - Chondroid tenosynovial giant cell tumor (5) - Chondroid neoplasm of synovium (1) - Atypical chondroid neoplasm (1) - Giant cell-rich lesion with chondroid stroma (1) |
| - Gastrointestinal stromal tumors - Osteosarcomas - Liposarcomas - Leiomyosarcomas - Myxofibrosarcomas - Synovial sarcomas - Ewing's sarcomas - Chondrosarcomas - Rhabdomyosarcomas - Aggressive fibromatosis - Angiosarcomas - Dermatofibrosarcoma protuberans - Undifferentiated pleomorphic sarcomas - Epithelioid hemangioendotheliomas - Myofibroblastic sarcomas - Myxoid sarcomas - Solitary fibrous tumor - Embryonic undifferentiated sarcoma - Alveolar soft part sarcoma - Clear cell sarcoma - Malignant granular cell tumor - Unclassified soft-tissue sarcomas - Unclassified osteogenic sarcomas - Infantile fibrosarcoma - *NTRK* rearrangement spindle cell mesenchymal tumors | 1 | - Gastrointestinal stromal tumors (23) - Osteosarcomas (22) - Liposarcomas (14) - Leiomyosarcomas (13) - Myxofibrosarcomas (12) - Synovial sarcomas (9) - Ewing's sarcomas (7) - Chondrosarcomas (5) - Rhabdomyosarcomas (5) - Aggressive fibromatosis (5) - Angiosarcomas (4) - Dermatofibrosarcoma protuberans (4) - Undifferentiated pleomorphic sarcomas (4) - Epithelioid hemangioendotheliomas (2) - Myofibroblastic sarcomas (2) - Myxoid sarcomas (2) - Solitary fibrous tumor (1) - Embryonic undifferentiated sarcoma (1) - Alveolar soft part sarcoma (1) - Clear cell sarcoma (1) - Malignant granular cell tumor (1) - Unclassified soft-tissue sarcomas (50) - Unclassified osteogenic sarcomas (4) - Infantile fibrosarcoma (2) - *NTRK* rearrangement spindle cell mesenchymal tumors (1) |
| - Spindle cell soft tissue sarcoma - Malignant peripheral nerve sheath tumor - Not mentioned | 1 | - Spindle cell soft tissue sarcoma (1) - Malignant peripheral nerve sheath tumor (2) - Not mentioned (162) |
| - Ewing sarcoma - EWSR1-non-ETS round cell sarcoma - Sarcoma with BCOR genetic alteration - Undifferentiated soft tissue sarcomas | 1 | - Ewing sarcoma (96) - EWSR1-non-ETS round cells sarcoma (3) - Sarcoma with BCOR genetic alteration (1) - Undifferentiated soft tissue sarcomas (5) |
| - Chondrosarcoma - Ewing sarcoma - Osteosarcoma - Angiosarcoma - Kaposi sarcoma - Leiomyosarcoma - Liposarcoma - Myxofibrosarcoma - Rhabdomyosarcoma - Synovial sarcoma - Sarcoma not otherwise specified | 1 | - Chondrosarcoma (10) - Ewing sarcoma (3) - Osteosarcoma (5) - Angiosarcoma (7) - Kaposi sarcoma (8) - Leiomyosarcoma (5) - Liposarcoma (9) - Myxofibrosarcoma (5) - Rhabdomyosarcoma (3) - Synovial sarcoma (3) - Sarcoma not otherwise specified (12) |
| - Liposarcoma - Leiomyosarcoma - Synovial sarcoma - Soft tissue sarcoma not specified | 1 | - Liposarcoma (32) - Leiomyosarcoma (59) - Synovial sarcoma (27) - Soft tissue sarcoma not specified (132) |
| - Adipocytic tumors - Fibroblastic and myofibroblastic tumors - Vascular tumors and malformations - Smooth muscle tumors - Skeletal muscle tumors - Peripheral nerve sheath tumors - Undifferentiated small round cell sarcomas of bone and soft tissue - Mesenchymal tumors of the digestive system - Tumors of uncertain differentiation - Cutaneous soft tissue tumors - Thoracic SMARCA4-deficient undifferentiated tumors - Chordomas - Biphenotypic sinonasal sarcomas | 1 | - Adipocytic tumors (31) - Fibroblastic and myofibroblastic tumors (45) - Vascular tumors and malformations (44) - Smooth muscle tumors (15) - Skeletal muscle tumors (16) - Peripheral nerve sheath tumors (36) - Undifferentiated small round cell sarcomas of bone and soft tissue (23) - Mesenchymal tumors of the digestive system (12) - Tumors of uncertain differentiation (74) - Cutaneous soft tissue tumors (19) - Thoracic SMARCA4-deficient undifferentiated tumors (5) - Chordomas (7) - Biphenotypic sinonasal sarcomas (3) |
| - Malignant peripheral nerve sheath tumor - *NTRK*-associated spindle cell sarcoma - Unclassifiable | 1 | - Malignant peripheral nerve sheath tumor (3) - *NTRK*-associated spindle cell sarcoma (1) - Unclassifiable (1) |
| - Lipofibromatosis-like neural tumor - Peripheral nerve sheath tumor - Cutaneous spindle cell mesenchymal tumor - Inflammatory myofibroblastic tumor - Gastrointestinal stromal tumor - Dedifferentiated liposarcoma - Undifferentiated pleomorphic sarcoma - Leiomyosarcoma - Intimal sarcoma - High-grade uterine sarcoma - Neurofibromatosis type 1-associated malignant peripheral nerve sheath tumor | 1 | - Lipofibromatosis-like neural tumor (2) - Peripheral nerve sheath tumor (1) - Cutaneous spindle cell mesenchymal tumor (1) - Inflammatory myofibroblastic tumor (3) - Gastrointestinal stromal tumor (1) - Dedifferentiated liposarcomas (2) - Undifferentiated pleomorphic sarcoma (2) - Leiomyosarcoma (1) - Intimal sarcoma (1) - High-grade uterine sarcoma (1) - Neurofibromatosis type 1-associated malignant peripheral nerve sheath tumor (1) |
| - Lipofibromatosis-like neural tumor - Malignant peripheral nerve sheath tumors-like - Myxofibrosarcoma-like | 1 | - Lipofibromatosis-like neural tumor (4) - Malignant peripheral nerve sheath tumors-like (8) - Myxofibrosarcoma-like (1) |
| - NTRK-rearranged spindle cell neoplasm - Sarcoma of intermediate malignancy - Solitary fibrous tumor - Dedifferentiated liposarcoma | 1 | - NTRK-rearranged spindle cell neoplasm (1) - Sarcoma intermediate malignancy (1) - Solitary fibrous tumor (3) - Dedifferentiated liposarcoma (1) |
| - Mesenchymal tumors - Inflammatory myofibroblastic tumor - Undifferentiated pleomorphic sarcomas - Myxofibrosarcomas - Malignant peripheral nerve sheath tumors - Dermatofibrosarcoma protuberans - Dedifferentiated liposarcomas - Solitary fibrous tumors - Synovial sarcomas - Leiomyosarcomas - *BCOR*-associated sarcomas - Gastrointestinal stromal tumors - Spindle cell/sclerosing rhabdomyosarcomas - Atypical spindle cell lipomatous tumors | 1 | - Mesenchymal tumors (38) - Inflammatory myofibroblastic tumor (15) - Undifferentiated pleomorphic sarcomas (20) - Myxofibrosarcomas (20) - Malignant peripheral nerve sheath tumors (20) - Dermatofibrosarcoma protuberans (20) - Dedifferentiated liposarcomas (10) - Solitary fibrous tumors (10) - Synovial sarcomas (10) - Leiomyosarcomas (10) - *BCOR*-associated sarcomas (10) - Gastrointestinal stromal tumors (10) - Spindle cell/sclerosing rhabdomyosarcomas (5) - Atypical spindle cell lipomatous tumors (5) |
| - Spindle cell sarcoma with rearrangement/SNV in *BRAF* gene - Pediatric spindle cell sarcomas with *NTRK1* fusion - High-grade sarcoma with ALK fusion - Pediatric sarcoma with tyrosine-kinase duplication of *EGFR* gene | 1 | - Spindle cell sarcoma with rearrangement/SNV in *BRAF* gene (6) - Pediatric spindle cell sarcomas with *NTRK1* fusion (3) - High-grade sarcoma with ALK fusion (1) - Pediatric sarcoma with tyrosine-kinase duplication of *EGFR* gene (1) |
| - Chondrosarcoma - Bone sarcoma not specified otherwise - Gastrointestinal stromal tumors - Soft tissue tumors not specified otherwise - Malignant peripheral nerve sheath tumor - Spindle cell sarcoma - Epithelioid spindle sarcoma - Inflammatory myofibroblastic tumor - Myopericytoma - Stromal tumor - Dedifferentiated liposarcoma - Fibrosarcoma - Synovial sarcoma | 1 | - Chondrosarcoma (1) - Bone sarcoma not specified otherwise (1) - Gastrointestinal stromal tumors (4) - Soft tissue tumors not specified otherwise (8) - Malignant peripheral nerve sheath tumor (6) - Spindle cell sarcoma (4) - Epithelioid spindle sarcoma (3) - Inflammatory myofibroblastic tumor (2) - Myopericytoma (2) - Stromal tumor (2) - Dedifferentiated liposarcoma (1) - Fibrosarcoma (1) - Synovial sarcoma (1) |
| - Inflammatory myofibroblastic tumor - Congenital mesoblastic nephroma - Sarcoma not otherwise specified - Ewing sarcoma - Leiomyosarcoma - Liposarcoma - Spindle cell rhabdomyosarcoma - Chondroblastic osteosarcoma - Clear cell sarcoma - Malignant peripheral nerve sheath tumor - Alveolar rhabdomyosarcoma - Infantile fibrosarcoma - Rhabdomyosarcoma not otherwise specified - Fibrosarcoma - Osteosarcoma - Synovial sarcoma - Endometrial stromal sarcoma - Undifferentiated pleomorphic sarcoma - Embryonal rhabdomyosarcoma - Myxofibrosarcoma - Ewing-like sarcoma - Spindle cell sarcoma - Dermatofibrosarcoma protuberans - Angiosarcoma | 1 | - Inflammatory myofibroblastic tumor (44) - Congenital mesoblastic nephroma (1) - Sarcoma not otherwise specified (56) - Ewing sarcoma (18) - Leiomyosarcoma (19) - Liposarcoma (14) - Spindle cell rhabdomyosarcoma (1) - Chondroblastic osteosarcoma (8) - Clear cell sarcoma (2) - Malignant peripheral nerve sheath tumor (11) - Alveolar rhabdomyosarcoma (7) - Infantile fibrosarcoma (3) - Rhabdomyosarcoma not otherwise specified (7) - Fibrosarcoma (3) - Osteosarcoma (5) - Synovial sarcoma (8) - Endometrial stromal sarcoma (5) - Undifferentiated pleomorphic sarcoma (3) - Embryonal rhabdomyosarcoma (4) - Myxofibrosarcoma (2) - Ewing-like sarcoma (1) - Spindle cell sarcoma (1) - Dermatofibrosarcoma protuberans (2) - Angiosarcoma (1) |
| - Malignant peripheral nerve sheath tumor-like - Adult fibrosarcoma-like - Malignant peripheral nerve sheath tumor - Infantile fibrosarcoma-like tumor | 1 | - Malignant peripheral nerve sheath tumor-like (1) - Adult fibrosarcoma-like (1) - Malignant peripheral nerve sheath tumor (1) - Infantile fibrosarcoma-like tumor (1) |
| - Infantile fibrosarcoma - Lipofibromatosis-like neural tumor - Malignant peripheral nerve sheath tumor-like - Adult-type fibrosarcoma-like - Inflammatory myofibroblastic tumor-like - Myxoma-like tumor | 1 | - Infantile fibrosarcoma (4) - Lipofibromatosis-like neural tumor (2) - Malignant peripheral nerve sheath tumor-like (3) - Adult-type fibrosarcoma-like (2) - Inflammatory myofibroblastic tumor-like (1) - Myxoma-like tumor (1) |
| - Fibrosarcoma - Infantile fibrosarcoma - Rhabdomyosarcoma - Soft tissue sarcoma of the abdomen - Spindle cell sarcoma - Prostatic stromal tumor - Mucinous liposarcoma - Leiomyosarcoma - Not mentioned | 1 | - Fibrosarcoma (49) - Infantile fibrosarcoma (6) - Rhabdomyosarcoma (1) - Soft tissue sarcoma of the abdomen (2) - Spindle cell sarcoma (4) - Prostatic stromal tumor (1) - Mucinous liposarcoma (2) - Leiomyosarcoma (1) - Not mentioned (505) |
| - COL1A1-PDGFB rearranged sarcoma - Adenosarcoma - Low-grade endometrial stromal sarcoma - Low-grade endometrial stromal sarcoma with high-grade transformation - High-grade endometrial stromal sarcoma - Uterine smooth muscle tumor of uncertain malignant potential - Leiomyosarcoma - Undifferentiated uterine sarcomas - Inflammatory myofibroblastic tumor - Solitary fibrous tumor - Embryonal rhabdomyosarcoma - Hybrid peripheral nerve sheath tumor - Low-grade fibromyxoid sarcoma - Fibroblastic/myofibroblastic tumor of uncertain malignant potential - *NTRK*-rearranged sarcoma | 1 | - COL1A1-PDGFB rearranged sarcoma (2) - Adenosarcoma (50) - Low-grade endometrial stromal sarcoma (122) - Low-grade endometrial stromal sarcoma with high-grade transformation (4) - High-grade endometrial stromal sarcoma (46) - Uterine smooth muscle tumor of uncertain malignant potential (13) - Leiomyosarcoma (19) - Undifferentiated uterine sarcomas (73) - Inflammatory myofibroblastic tumor (4) - Solitary fibrous tumor (2) - Embryonal rhabdomyosarcoma (1) - Hybrid peripheral nerve sheath tumor (1) - Low-grade fibromyxoid sarcoma (1) - Fibroblastic/myofibroblastic tumor of uncertain malignant potential (1) - *NTRK*-rearranged sarcoma (12) |
| - Leiomyosarcoma - Myxofibrosarcoma - Myxoid liposarcoma - Pleomorphic leiomyosarcoma - High-grade myxofibrosarcoma - Malignant peripheral nerve sheath tumor - Alveolar soft part sarcoma - High-grade sarcoma, not otherwise specified - Dedifferentiated liposarcoma - Osteosarcoma - Dermatofibrosarcoma protuberans - Synovial sarcoma - Undifferentiated pleomorphic sarcoma - Extraskeletal osteosarcoma - Epithelioid hemangioendothelioma - Epithelioid sarcoma - Low-grade myxofibrosarcoma - Well-differentiated liposarcoma - Periosteal osteosarcoma - Myxoid sarcoma - High-grade myxoid sarcoma - Low-grade myxoid sarcoma - Inflammatory myofibroblastic tumor - Ewing sarcoma - Rhabdomyosarcoma - Angiosarcoma - Extraskeletal myxoid chondrosarcoma - Chondrosarcoma - Intimal sarcoma - Malignant Triton tumor - Superficial CD34-positive fibroblastic tumor - High-grade spindle cell sarcoma - Small-round cell sarcoma, not otherwise specified - Low-grade sarcoma, not otherwise specified | 1 | - Leiomyosarcoma (10) - Myxofibrosarcoma (6) - Myxoid liposarcoma (6) - Pleomorphic leiomyosarcoma (5) - High-grade myxofibrosarcoma (4) - Malignant peripheral nerve sheath tumor (4) - Alveolar soft part sarcoma (4) - High-grade sarcoma, not otherwise specified (4) - Dedifferentiated liposarcoma (3) - Osteosarcoma (3) - Dermatofibrosarcoma protuberans (3) - Synovial sarcoma (3) - Undifferentiated pleomorphic sarcoma (3) - Extraskeletal osteosarcoma (2) - Epithelioid hemangioendothelioma (2) - Epithelioid sarcoma (2) - Low-grade myxofibrosarcoma (1) - Well-differentiated liposarcoma (1) - Periosteal osteosarcoma (1) - Myxoid sarcoma (1) - High-grade myxoid sarcoma (1) - Low-grade myxoid sarcoma (1) - Inflammatory myofibroblastic tumor (1) - Ewing sarcoma (1) - Rhabdomyosarcoma (1) - Angiosarcoma (1) - Extraskeletal myxoid chondrosarcoma (1) - Chondrosarcoma (1) - Intimal sarcoma (1) - Malignant Triton tumor (1) - Superficial CD34-positive fibroblastic tumor (1) - High-grade spindle cell sarcoma (1) - Small-round cell sarcoma, not otherwise specified (1) - Low-grade sarcoma, not otherwise specified (1) |
| - Gynecological sarcoma - Gastrointestinal stromal tumor - Infantile fibrosarcoma - Malignant peripheral nerve sheath tumor | 1 | - Gynecological sarcoma (28) - Gastrointestinal stromal tumor (6) - Infantile fibrosarcoma (1) - Malignant peripheral nerve sheath tumor (1) |
| - Infantile fibrosarcoma - Pattern with stromal and perivascular hyalinization - Lipofibromatosis-like neural tumor - Malignant peripheral nerve sheath tumor - Myopericytoma-like tumor - Lipofibromatosis-like neural tumor/stromal perivascular hyalinization - Epitheloid/rhabdoid | 1 | - Infantile fibrosarcoma (11) - Pattern with stromal and perivascular hyalinization (5) - Lipofibromatosis-like neural tumor (2) - Malignant peripheral nerve sheath tumor (1) - Myopericytoma-like tumor (1) - Lipofibromatosis-like neural tumor/stromal perivascular hyalinization (1) - Epitheloid/rhabdoid (1) |
| - Leiomyosarcoma - Dedifferentiated liposarcoma - Undifferentiated pleomorphic sarcoma - Not mentioned | 1 | - Leiomyosarcoma (357) - Dedifferentiated liposarcoma (178) - Undifferentiated pleomorphic sarcoma (82) - Not mentioned (770) |
| - Infantile fibrosarcoma - Peripheral nerve sheath sarcoma - Low-grade soft tissue sarcoma - Mesenchymal spindle cell sarcoma/malignant peripheral nerve sheath tumor | 1 | - Infantile fibrosarcoma (8) - Peripheral nerve sheath sarcoma (1) - Low-grade soft tissue sarcoma (1) - Mesenchymal spindle cell sarcoma/malignant peripheral nerve sheath tumor (1) |
| - Not mentioned - Fibrosarcoma - Ewing's sarcoma | 1 | - Not mentioned (379) - Fibrosarcoma (1) - Ewing’s sarcoma (1) |
| - Angiomatoid fibrous histiocytoma - Angiosarcoma - Dedifferentiated liposarcoma - Well-differentiated liposarcoma - Ewing sarcoma of soft tissue - Gastrointestinal stromal tumor - Not otherwise specified sarcoma - Unclassified sarcoma | 1 | - Angiomatoid fibrous histiocytoma (1) - Angiosarcoma (106) - Dedifferentiated liposarcoma (187) - Well-differentiated liposarcoma (30) - Ewing sarcoma of soft tissue (24) - Gastrointestinal stromal tumor (166) - Not otherwise specified sarcoma (81) - Unclassified sarcoma (1482) |
| - Liposarcoma - Malignant peripheral nerve sheath tumor - Infantile fibrosarcoma - Mullerian adenosarcoma - Uterine leiomyosarcoma | 1 | - Liposarcoma (1) - Malignant peripheral nerve sheath tumor (1) - Infantile fibrosarcoma (1) - Mullerian adenosarcoma (1) - Uterine leiomyosarcoma (1) |
| - Unclassified sarcoma - Spindle cell sarcoma - GIST - Leiomyosarcoma - Angiosarcoma - Cervical adenosarcoma - Chondrosarcoma - Endometrial sarcoma - Endometrial stromal sarcoma - Follicular dendritic cell sarcoma - MPNST | 1 | - Unclassified sarcoma (10) - Spindle cell sarcomas (5) - GIST (2) - Leiomyosarcoma (2) - Angiosarcoma (1) - Cervical adenosarcoma (1) - Chondrosarcoma (1) - Endometrial sarcoma (1) - Endometrial stromal sarcoma (1) - Follicular dendritic cell sarcoma (1) - MPNST (1) |

**Supplementary Table 2- Number of studies and patients based on location of sarcoma**

| Location of tumor | Number of studies | Number of patients |
| --- | --- | --- |
| - Flank - Lower limb | 1 | - Flank (1) - Lower limb (3) |
| - Kidney - Back - Hand - Neck - Forearm | 1 | - Kidney (6) - Back (2) - Hand (1) - Neck (1) - Forearm (1) |
| - Lower limb | 1 | - Lower limb/groin/pelvis/pulmonary (1) |
| - Kidney | 2 | - Kidney (2) |
| - Thigh - Popliteal fossa - Kidney | 1 | - Thigh (1) - Popliteal fossa (1) - Right kidney (1) |
| - Retroperitoneum | 1 | - Retroperitoneum (1) |
| - Thigh | 2 | - Thigh (2) |
| - Small intestine - Rectum | 1 | - Small intestine (4) - Rectum (1) |
| - Gastrointestinal tract | 1 | - Gastrointestinal tract (191) |
| - Neck | 2 | - Neck (2) |
| - Buttock | 3 | - Buttock (3) |
| - Ileocecal | 2 | - Ileum (1) - Ileocecal region (1) |
| - Back | 3 | - Back (3) |
| - Elbow | 1 | - Elbow (1) |
| - Uterus | 4 | - Uterus (6) |
| - Lower extremities - Upper extremities - Pelvis | 1 | - Lower extremities (15) - Upper extremities (2) - Pelvis (1) |
| - Forearm | 1 | - Forearm (1) |
| - Uterine cervix - Uterus | 2 | - Uterine cervix (6) - Uterus (19) - Uterine corpus (1) |
| - Uterine cervix - Uterine corpus - Vagina | 1 | - Uterine cervix (10) - Uterine corpus (2) - Vagina (1) |
| - Rectum | 1 | - Rectum (1) |
| - Forearm - Thigh | 1 | - Forearm (1) - Thigh (1) |
| - Colon | 1 | - Colon (1) |
| - Uterine cervix | 3 | - Uterine cervix (3) |
| - Arm | 1 | - Arm (1) |
| - Abdominal wall | 2 | - Abdominal cutaneous lesion (1) - Abdominal wall (1) |
| - Pelvis | 2 | - Pelvis (2) |
| - Scalp | 2 | - Scalp (2) |
| - Calf | 1 | - Calf (1) |
| - Chest | 2 | - Chest (1) - Chest wall (1) |
| - Vagina | 1 | - Vagina (1) |
| - Ankle | 1 | - Ankle (1) |
| - Brain | 1 | - Brain (1) |
| - Knee | 1 | - Knee (1) |
| - Gluteal area | 2 | - Gluteal area (2) |
| - Cervix | 2 | - Cervix (3) |
| - Soft tissue - Bone | 1 | - Soft tissue (23) - Bone (82) |
| - Intrathoracic | 1 | - Intrathoracic (1) |
| - Femur | 1 | - Femur (1) |
| - Periadrenal - Retroperitoneal | 1 | - Peri-adrenal (1) - Retroperitoneal (1) |
| - Cardiac | 1 | - Cardiac (4) |
| - Esophagus | 1 | - Esophagus (1) |
| - Trunk - Lower limb - Neck - Upper limb | 1 | - Trunk (4) - Lower limbs (2) - Neck (1) - Upper limbs (1) |
| - Back - Thigh - Wrist | 1 | - Back (3) - Thigh (1) - Wrist (1) |
| - Foot | 1 | - Foot (1) |
| - Lower limb - Buttock - Perineal | 1 | - Lower limb (4) - Buttock (1) - Perineal (1) |
| - Mediastinum | 1 | - Mediastinum (1) |
| - Leg | 2 | - Leg (1) - Distal left leg/Kager space/posterior cortical of the tibia/left Achilles tendon (1) |
| - Head and neck - Tibia - Pelvis - Chest wall | 1 | - Head and neck (1) - Tibia (1) - Pelvis (1) - Chest wall (1) |
| - Uterine corpus - Cervix - Vulva - Metastasis | 1 | - Uterine corpus (324) - Cervix (9) - Vulva (2) - Metastasis (16) |
| - Colon - Small intestine - Rectum - Stomach | 1 | - Colon (3) - Small intestine (2) - Rectum (2) - Stomach (1) |
| - Not Mentioned | 37 | - Not mentioned |
| - Lower extremities - Upper extremities - Neck - Abdomen - Face - Back - Buttock - Chest wall - Multicentric - Flank - Lung - Prostate | 1 | - Lower extremities (17) - Upper extremities (7) - Neck (7) - Abdomen (7) - Face (7) - Back (5) - Buttock (3) - Chest wall (3) - Multicentric (2) - Flank (2) - Lung (1) - Prostate (1) |
| - Lower limb - Upper limb - Jaw angle - Not specified (remaining cases) | 1 | - Lower limb (7) - Upper limb (1) - Jaw angle (1) - Rest unspecified |
| - Back - Paravertebral lumbar - Supraclavicular - Upper arm | 1 | - Back (1) - Paravertebral lumbar (1) - Supraclavicular (1) - Upper arm (1) |
| - Forearm - Hand - Antecubital - Thigh - Flank - Arm - Foot - Scalp - Leg | 1 | - Forearm (2) - Hand (1) - Antecubital (1) - Thigh (1) - Flank (1) - Arm (1) - Foot (1) - Scalp (1) - Leg (1) |
| - Lower limb - Upper limb - Truncal/abdominopelvic/paravertebral region - Head and neck - Sacrococcygeal region - Inguinal region - The rest were not specified | 1 | - Lower limb (6) - Upper limb (4) - Truncal/abdominopelvic/paravertebral region (11) - Head and neck (5) - Sacrococcygeal region (1) - Inguinal region (3) - Rest unspecified |
| - Retroperitoneal - Pelvis - Spine extradural - Thigh - Extensor tendon of foot - Forearm - Lumbar | 1 | - Retroperitoneal (3) - Pelvis (2) - Spine extradural (1) - Thigh (1) - Extensor tendon of foot (1) - Forearm (1) - Lumbar (1) |
| - Limbs - Gastrointestinal tract - Abdomen - Chest wall - Back - Head | 1 | - Limbs (14) - Gastrointestinal tract (2) - Abdomen (1) - Chest wall (4) - Back (2) - Head (2) |
| - Left foot - Buttock - Right hip - Left neck - Right chest wall - Hand back - Left flank | 1 | - Left foot (1) - Buttock (2) - Right hip (1) - Left neck (3) - Right chest wall (1) - Hand back (1) - Left flank (1) |
| - Lumbosacral region | 1 | - Lumbosacral region/erector spinae/fifth lumbar vertebra/first sacral vertebra/iliac wing (1) |
| - Lower limbs - Upper limbs - Abdomen - Pelvis - Retroperitoneal - Trunk - Back - Dural - Lung - Paraspinal | 1 | - Lower limbs (9) - Upper limbs (8) - Abdomen (1) - Pelvis (2) - Retroperitoneal (2) - Trunk (2) - Back (1) - Dural (1) - Lung (1) - Paraspinal (1) |
| - Thigh - Popliteal - Abdomino-pelvic - Retroperitoneal - Paraspinal - Foot - Mesentery | 1 | - Thigh (1) - Popliteal (1) - Abdomino-pelvic (1) - Retroperitoneal (1) - Paraspinal (1) - Foot (1) - Mesentery (1) |
| - Dura - Dermis and subcutaneous tissue - Tongue - Buttock - Shoulder - Foot - Abdominal cavity - Sacrococcygeal area - Lung | 1 | - Dura (1) - Dermis and subcutaneous tissue (1) - Tongue (1) - Buttock (1) - Shoulder (1) - Foot (1) - Abdominal cavity (1) - Sacrococcygeal area (1) - Lung (1) |
| - Liver - Subcutaneous - Thyroid - Lung - Uterine cervix - Toe | 1 | - Liver (1) - Subcutaneous (1) - Thyroid (1) - Lung (1) - Uterine cervix (1) - Toe (1) |
| - Small bowel - Stomach - Rectum - Mesentery | 1 | - Small bowel (3) - Stomach (1) - Rectum (1) - Mesentery (1) |
| - Lower leg - Forearm - Lung - Neck - Others not specified | 1 | - Lower leg (2) - Forearm (1) - Lung (1) - Neck (1) - Others not specified |
| - Chest wall - Hand - Femur - Paraspinal neck - Tibia - Thigh | 1 | - Chest wall (1) - Hand (1) - Femur (1) - Paraspinal neck (1) - Tibia (1) - Thigh (1) |
| - Temporomandibular joint/Temporal bone - Hand/Digits - Foot | 1 | - Temporomandibular joint/Temporal bone (4) - Hand/Digits (3) - Foot (1) |
| - Bone - Deep soft tissue extremities - Deep soft tissue trunk and back - Deep soft tissue head and neck - Skin and subcutaneous fat tissue - Abdomen - Mediastinum - Retroperitoneum | 1 | - Bone (19) - Deep soft tissue extremities (17) - Deep soft tissue trunk and back (5) - Deep soft tissue head and neck (4) - Skin and subcutaneous fat tissue (12) - Abdomen (6) - Mediastinum (5) - Retroperitoneum (2) |
| - Back - Upper limbs - Lower limbs - Abdomen - Pulmonary artery - Mediastinal - Spermatic cord - Uterine | 1 | - Back (4) - Upper limbs (2) - Lower limbs (2) - Abdomen (2) - Pulmonary artery (1) - Mediastinal (1) - Spermatic cord (1) - Uterine (1) |
| - Back - Abdominal wall - Upper limb - Lower limb - Buttock - Small intestine - Rectum | 1 | - Back (1) - Abdominal wall (1) - Upper limb (4) - Lower limb (2) - Buttock (2) - Small intestine (1) - Rectum (2) |
| - Head & neck - Upper limb - Lower limb - Intradural - Pelvic iliac bone - Chest - Breast - Kidney - Jejunum - Retroperitoneum - Not mentioned | 1 | - Head & neck (6) - Upper limb (4) - Lower limb (15) - Intradural (1) - Pelvic iliac bone (1) - Chest (3) - Breast (1) - Kidney (1) - Jejunum (1) - Retroperitoneum (3) - Not mentioned (167) |
| - Lower limb - Upper limb - Retroperitoneum - Uterus - Cervix - Face - Hip - Duodenum - Scalp - Coccygeal region - Nuchal region - Orbit - Back | 1 | - Lower limb (4) - Upper limb (2) - Retroperitoneum (3) - Uterus (1) - Cervix (1) - Face (3) - Hip (1) - Duodenum (1) - Scalp (1) - Coccygeal region (1) - Nuchal region (1) - Orbit (1) - Back (1) |
| - Limbs - Non-parameningeal head and neck - Thoracic - Abdomen/pelvis - Orbit - Kidney - Paraspinal | 1 | - Limbs (57) - Non-parameningeal head and neck (10) - Thoracic (9) - Abdomen/Pelvis (8) - Orbit (4) - Kidney (3) - Paraspinal (2) |
| - Head and neck region | 1 | - Head and neck (13) |
| - Head and neck - Thorax - Abdomen - Pelvis - Extremities - Skin | 1 | - Numbers not mentioned |
| - Thigh - Lung - Mediastinal lymph nodes - double lung metastasis retroperitoneal area - Abdomen | 1 | - Numbers not mentioned |
| - Chest - Arm - Not specified | 1 | - Chest (2) - Arm (1) - Not specified (162) |
| - Lung - Heart - Pleura - Prostate - Uterine cervix - Not mentioned | 1 | - Lung (1) - Heart (1) - Pleura (1) - Prostate (1) - Uterine cervix (2) - Not mentioned (1) |
