# Supplementary material for: NTRK1-3 Fusions in Sarcomas: Prevalence, Significance, and Clinical Implications – A Systematic Review
Source: Research Square preprint supplement (doi:10.21203/rs.3.rs-6512957/v1), 2025-05-23
Supplement: Supplementary file 3 [file 4f0e53eae73c8a9fcba83446.docx]

**PubMed (May 20, 2024)**

Search #1 search terms for NTRK (n=7 556)

(((((((((((((((ntrk receptors[MeSH Terms]) OR (neurotrophic tyrosine kinase, receptor related proteins[MeSH Terms])) OR (neurotrophic tyrosine kinase receptor type 1[MeSH Terms])) OR (neurotrophic tyrosine kinase receptor type 2[MeSH Terms])) OR (neurotrophic tyrosine kinase receptor type 3[MeSH Terms])) OR (ntrk3 receptor[MeSH Terms])) OR (ntrk[MeSH Terms])) OR (ntrk1 receptor[MeSH Terms])) OR (ntrk2 receptor[MeSH Terms])) OR (ntrk3 protein[MeSH Terms])) OR (ntrk receptors[MeSH Terms])) OR (ntrk2 receptor[MeSH Terms])) OR (kinase trkc, protein tyrosine[MeSH Terms])) OR (gp140 c trk[MeSH Terms])) OR (c trk, proto oncogene products[MeSH Terms])) OR (c trk, gp140[MeSH Terms]))

Search #2 search terms for sarcoma (n=663 140)

(sarcomas OR fibrosarcoma* OR osteosarcoma* OR rhabdomyosarcoma* OR chondrosarcoma* OR leiomyosarcoma* OR liposarcoma* OR angiosarcoma* OR "gastrointestinal stromal" OR GIST OR "soft tissue" OR lipoma* OR "undifferentiated pleomorphic" OR "poorly differentiated sarcoma" OR "poorly differentiated sarcomas" OR myxofibrosarcoma* OR dermatofibrosarcoma* OR "malignant peripheral nerve" OR hemangioma* OR schwannoma* OR fibroma* OR neurofibroma* OR "benign fibrous histiocytoma" OR "fibrous tumor" OR "fibrous tumour" OR mesenchymal OR "spindle cell" OR "pleomorphic sarcomas" OR "pleomorphic sarcomas")

Search #3- Search #1 AND #2 (n= 418)

**SCOPUS (May 21, 2024)**

Search #1- search terms for NTRK within abstract (n= 1 137)

NTRK

Search #2 search terms for sarcoma within abstract (n= 98 192)

sarcoma

Search #3- Search #1 AND #2 (n= 144)

**European Society for Medical Oncology (ESMO)** **(May 20, 2024)**

Search #1- search terms for NTRK (n= 118)

TRK OR NTRK OR "neurotrophic tyrosine receptor kinase" OR "neurotrophic tyrosine kinase" OR "neurotrophic tyrosine kinase receptor type 1" OR "neurotrophic tyrosine kinase receptor type 2" OR "neurotrophic tyrosine kinase receptor type 3" OR "ntrk3" OR "ntrk" OR "ntrk1" OR "ntrk2" OR "ntrk receptors" OR "kinase trkc" OR "protein tyrosine" OR "gp140 c trK" OR "c trk"

Search #2 search terms for sarcoma (n= 802)

(sarcomas OR fibrosarcoma* OR osteosarcoma* OR rhabdomyosarcoma* OR chondrosarcoma* OR leiomyosarcoma* OR liposarcoma* OR angiosarcoma* OR "gastrointestinal stromal" OR GIST OR "soft tissue" OR lipoma* OR "undifferentiated pleomorphic" OR "poorly differentiated sarcoma" OR "poorly differentiated sarcomas" OR myxofibrosarcoma* OR dermatofibrosarcoma* OR "malignant peripheral nerve" OR hemangioma* OR schwannoma* OR fibroma* OR neurofibroma* OR "benign fibrous histiocytoma" OR "fibrous tumor" OR "fibrous tumour" OR mesenchymal OR "spindle cell" OR "pleomorphic sarcomas" OR "pleomorphic sarcomas")

Search #3- Search #1 AND #2 (n= 51)

**The American Society of Clinical Oncology (ASCO)** **(May 20, 2024)**

Search #1- search terms for NTRK (n= 118)

TRK OR NTRK OR "neurotrophic tyrosine receptor kinase" OR "neurotrophic tyrosine kinase" OR "neurotrophic tyrosine kinase receptor type 1" OR "neurotrophic tyrosine kinase receptor type 2" OR "neurotrophic tyrosine kinase receptor type 3" OR "ntrk3" OR "ntrk" OR "ntrk1" OR "ntrk2" OR "ntrk receptors" OR "kinase trkc" OR "protein tyrosine" OR "gp140 c trK" OR "c trk"

Search #2 search terms for sarcoma (n= 802)

(sarcomas OR fibrosarcoma* OR osteosarcoma* OR rhabdomyosarcoma* OR chondrosarcoma* OR leiomyosarcoma* OR liposarcoma* OR angiosarcoma* OR "gastrointestinal stromal" OR GIST OR "soft tissue" OR lipoma* OR "undifferentiated pleomorphic" OR "poorly differentiated sarcoma" OR "poorly differentiated sarcomas" OR myxofibrosarcoma* OR dermatofibrosarcoma* OR "malignant peripheral nerve" OR hemangioma* OR schwannoma* OR fibroma* OR neurofibroma* OR "benign fibrous histiocytoma" OR "fibrous tumor" OR "fibrous tumour" OR mesenchymal OR "spindle cell" OR "pleomorphic sarcomas" OR "pleomorphic sarcomas")

Search #3- Search #1 AND #2 (n= 51)

**Web of science (May 22, 2024)**

Search #1- search terms for NTRK within abstract (n= 978)

NTRK

Search #2 search terms for sarcoma within abstract (n= 73 263)

sarcoma

Search #3- Search #1 AND #2 (n= 127)

**American Association for Cancer Research (AACR) (May 21, 2024)**

Search terms for NTRK manually (n=0)

**Updated search on July 14th 2024**

**PubMed**

Search #1 search terms for NTRK (n=64) from May 20, 2024 to July 14, 2024

(((((((((((((((ntrk receptors[MeSH Terms]) OR (neurotrophic tyrosine kinase, receptor related proteins[MeSH Terms])) OR (neurotrophic tyrosine kinase receptor type 1[MeSH Terms])) OR (neurotrophic tyrosine kinase receptor type 2[MeSH Terms])) OR (neurotrophic tyrosine kinase receptor type 3[MeSH Terms])) OR (ntrk3 receptor[MeSH Terms])) OR (ntrk[MeSH Terms])) OR (ntrk1 receptor[MeSH Terms])) OR (ntrk2 receptor[MeSH Terms])) OR (ntrk3 protein[MeSH Terms])) OR (ntrk receptors[MeSH Terms])) OR (ntrk2 receptor[MeSH Terms])) OR (kinase trkc, protein tyrosine[MeSH Terms])) OR (gp140 c trk[MeSH Terms])) OR (c trk, proto oncogene products[MeSH Terms])) OR (c trk, gp140[MeSH Terms]))

Search #2 search terms for sarcoma (n= 5 527) from May 20, 2024 to July 14, 2024

(sarcomas OR fibrosarcoma* OR osteosarcoma* OR rhabdomyosarcoma* OR chondrosarcoma* OR leiomyosarcoma* OR liposarcoma* OR angiosarcoma* OR "gastrointestinal stromal" OR GIST OR "soft tissue" OR lipoma* OR "undifferentiated pleomorphic" OR "poorly differentiated sarcoma" OR "poorly differentiated sarcomas" OR myxofibrosarcoma* OR dermatofibrosarcoma* OR "malignant peripheral nerve" OR hemangioma* OR schwannoma* OR fibroma* OR neurofibroma* OR "benign fibrous histiocytoma" OR "fibrous tumor" OR "fibrous tumour" OR mesenchymal OR "spindle cell" OR "pleomorphic sarcomas" OR "pleomorphic sarcomas")

Search #3- Search #1 AND #2 (n= 10)

**SCOPUS**

Search #1- search terms for NTRK within article title, abstract, keywords in 2024 (n= 156)

NTRK

Search #2 search terms for sarcoma within article title, abstract, keywords in 2024 (n= 3 340)

sarcoma

Search #3- Search #1 AND #2 (n= 32)

**ESMO**

Search #1- search terms for NTRK (n= 3) from May 2024 to July 2024

TRK OR NTRK OR "neurotrophic tyrosine receptor kinase" OR "neurotrophic tyrosine kinase" OR "neurotrophic tyrosine kinase receptor type 1" OR "neurotrophic tyrosine kinase receptor type 2" OR "neurotrophic tyrosine kinase receptor type 3" OR "ntrk3" OR "ntrk" OR "ntrk1" OR "ntrk2" OR "ntrk receptors" OR "kinase trkc" OR "protein tyrosine" OR "gp140 c trK" OR "c trk"

Search #2 search terms for sarcoma (n= 171) from May 2024 to July 2024

(sarcomas OR fibrosarcoma* OR osteosarcoma* OR rhabdomyosarcoma* OR chondrosarcoma* OR leiomyosarcoma* OR liposarcoma* OR angiosarcoma* OR "gastrointestinal stromal" OR GIST OR "soft tissue" OR lipoma* OR "undifferentiated pleomorphic" OR "poorly differentiated sarcoma" OR "poorly differentiated sarcomas" OR myxofibrosarcoma* OR dermatofibrosarcoma* OR "malignant peripheral nerve" OR hemangioma* OR schwannoma* OR fibroma* OR neurofibroma* OR "benign fibrous histiocytoma" OR "fibrous tumor" OR "fibrous tumour" OR mesenchymal OR "spindle cell" OR "pleomorphic sarcomas" OR "pleomorphic sarcomas")

Search #3- Search #1 AND #2 (n= 1)

**ASCO**

Journal of clinical oncology Volume 42 (issues 15-20) were screened manually (n= 0)

Journal of precision oncology Volume 8 was screened manually (n= 1)

Journal of oncology practice Volume 20 (issues 5-7) were screened manually (n= 0)

Journal of global oncology Volume 10 was screened manually (n= 0)

**Web of science**

Search #1- search terms for NTRK within abstract from May 20, 2024 to July 14, 2024

(n= 43)

NTRK

Search #2 search terms for sarcoma within abstract (n= 598)

sarcoma

Search #3- Search #1 AND #2 (n= 6)

**AACR**

Search terms for NTRK from May 20 2024 to July 14 2024 (n = 0)
