# Supplementary material for: NTRK1-3 Fusions in Sarcomas: Prevalence, Significance, and Clinical Implications – A Systematic Review
Source: Research Square preprint supplement (doi:10.21203/rs.3.rs-6512957/v1), 2025-05-23
Supplement: Supplementary file 4 [file 7c242fbe18ea618c427d084b.xlsx]

## Sheet: Sheet1
Title	Author, year	Study duration	Country	Study design	Pediatrics/Adults	mean age (±SD)	no of females and %	Type of mutation detection method	histological features	tumor location	total sample size of patients with sarcoma	no. of pts in each type of sarcoma/s	no. of patients with NTRK fusion	no. of patients with NTRK1 fusion	no. of patients with NTRK2 fusion	no. of patients with NTRK3 fusion	no. of patients and specific type of NTRK1 fusion	no. of patients and specific type of NTRK2 fusion	no. of patients and specific type of NTRK3 fusion	therapy	response to therapy (x/y) in each type of sarcoma	any patients outcomes reported	local recurrence	follow-up period	notes	Q1	Q2	Q3	Q4	Q5	Q6	Q7	Q8	Q9	Q10	Q11	Q12	Q13	Q14	Q15	Q16	Q17	Q18	Q19	Q20	Q21	Q22	Q23	Q24
A novel ETV6-NTRK3 gene fusion in congenital fibrosarcoma	Knezevich, 1998	From 1988 to 1998	Canada, United States of America	Case series	Pediatrics	Not mentioned	Not mentioned	cytogenic analysis, karyotype, FISH, RT-PCR, northern and southern blots	Not mentioned	flank (1), lower limb (3)	4	4 with infantile fibrosarcoma	3	0	0	3	0	0	ETV6–NTRK3 (3)	not mentioned	Not mentioned	Not mentioned	Not mentioned	Not mentioned		1	1	0	1	1	1	1	1	1	1	1	1	0	0	0	0	0	1	1	1	1	0	1	0
Congenital mesoblastic nephroma t(12;15) is associated with ETV6-NTRK3 gene fusion: cytogenetic and molecular relationship to congenital (infantile) fibrosarcoma	Rubin, 1998	Not mentioned	United States of America	Retrospective descriptive	Pediatrics	Not mentioned	5/11 (45.5%)	Karyotyping, FISH, RT-PCR, DNA sequencing	CMNs classic, cellular, mixed: variably cellular proliferation of bland spindle cells arranged in interlacing bundles	kidney (6), back (2), hand (1), neck (1), forearm (1)	11	6 with congenital mesoblastic nephroma and 5 with Congenital fibrosarcoma	6	0	0	6	0	0	ETV6-NTRK3 (6)	not mentioned	Not mentioned	Not mentioned	Not mentioned	Not mentioned		1	1	0	1	1	1	1	1	1	1	1	1	0	0	0	0	0	1	1	1	1	0	0	0
ETV6-NTRK3 Gene Fusions and Trisomy 11 Establish a Histogenetic Link between Mesoblastic Nephroma and Congenital Fibrosarcoma	Knezevich, 1998	From 1988 to 1998	Canada, United States of America	Retrospective descriptive	Pediatrics	5 months	7/15 (47%)	RT-PCR, FISH, Northern Blot	Cellular, Mixed, Classical CMN	Not mentioned	15	9 with Cellular CMN, 2 with mixed CMN, 4 with classical CMN	10	0	0	10	0	0	ETV6-NTRK3 (10)	Not mentioned	Not mentioned	Not mentioned	Not mentioned	Not mentioned		1	1	0	1	1	1	1	1	1	1	1	1	0	0	0	0	0	1	1	1	1	0	0	0
Detection of the ETV6-NTRK3 chimeric RNA of infantile fibrosarcoma/cellular congenital mesoblastic nephroma in paraffin-embedded tissue: application to challenging pediatric renal stromal tumors	Argani, 2000	Not mentioned	United States of America	Retrospective descriptive	Pediatrics	Not mentioned	Not mentioned	RT-PCR	Dense spindle cell fascicular pattern typical of Congenital mesonephric blastoma	Not mentioned	11	11 with Congenital Mesoblastic Nephroma	10	0	0	10	0	0	ETV6-NTRK3 (10)	not mentioned	Not mentioned	Not mentioned	Not mentioned	Not mentioned		0	1	0	1	1	1	1	1	1	1	1	1	0	0	0	0	0	0	1	1	1	0	0	0
Molecular Detection of the ETV6-NTRK3 Gene Fusion Differentiates Congenital Fibrosarcoma From Other Childhood Spindle Cell Tumors	Bourgeoi, 2000	Not mentioned	United States of America	Retrospective descriptive	Both	Not mentioned	7/24 (29%)	RT-PCR	Not mentioned	lower extremities (17), upper extremeties (7), neck (7), abdomen (7), face (7), back (5), buttock (3), chest wall (3), multicentric (2), flank (2), lung (1), prostate (1)	24	13 with malignant spindle cell tumors, 11 with congenital fibrosarcoma	10	0	0	10	0	0	ETV6-NTRK3 (10)	not mentioned	Not mentioned	Not mentioned	Not mentioned	Not mentioned		1	0	0	1	1	1	1	1	1	1	1	1	0	0	0	0	0	1	1	1	1	0	0	0
ETV6-NTRK3 gene fusion in metastasizing congenital fibrosarcoma	Punnett, 2000	Not mentioned	United States of America	Case report	Pediatrics	11 months	0/1 (0%)	Karyotyping, FISH, RT-PCR	herringbonepattern of intersecting fascicles of spindle cells	lower limb/groin/pelvis/pulmonary (1)	1	1 with Congenital fibrosarcoma	1	0	0	1	0	0	ETV6–NTRK3 (1)	Vincristine, d-actinomycin, cyclophosphamide; Ifosfamide, carboplatin, etoposide, GM-CSF	0/1 responded to therapy	Metastases (1), death (1)	1 patient	7 months		1	1	0	1	1	1	1	1	1	1	1	1	0	0	0	0	1	1	1	1	1	1	0	0
Congenital-infantile fibrosarcoma. A clinicopathologic study of 10 cases and molecular detection of the ETV6-NTRK3 fusion transcripts using paraffin-embedded tissues	Sheng, 2001	Not mentioned	Japan, Sweden	Retrospective descriptive	Both	Not mentioned	Not mentioned	RT-PCR, DNA sequencing	Cellular and composed of uniform oval to spindle-shaped cells with hyperchromatic nuclei separated by variable amounts of collagen. Presence of a herringbone pattern similar to that of adult-type fibrosarcoma in 3 lesions. Three tumors displayed a prominent hemangiopericytoma-like vascular pattern. In one case, the tumor consisted mainly of more immature, small, round to oval cells with minimal a…	Lower limb (7), upper limb (1), jaw angle (1). The rest were not specified.	40	10 with Congenital-infantile fibrosarcoma, 7 with adult-type fibrosarcoma, 4 with leiomyosarcoma, 4 with a storiform-pleomorphic variant of malignant fibrous histiocytoma, 4 with monophasic synovial sarcoma, 3 with malignant peripheral nerve sheath tumor, 4 with dermatofibrosarcoma protuberans, 4 with fibromatosis.	7	0	0	7	0	0	ETV6-NTRK3 (7)	local excision of 10 CIFS cases	9/10 CIFS patients responded to excision, 1/10 CIFS patient was a recent case therefore no data on his outcome.	9 out of 10 CIFS patients were alive and well without local recurrence or metastasis after a follow-up of 14 to 32 years. 1 CIFS patient was a recent case therefore no data on his outcome.	none	14 to 32 years		1	1	0	1	1	1	1	1	1	1	1	1	0	0	0	0	1	1	1	1	1	0	0	0
Gene expression of TrkC (NTRK3) in human soft tissue tumours	Hisaoka, 2002	Not mentioned	Japan, China	Case series	Not mentioned	Not mentioned	Not mentioned	RT-PCR	Not mentioned	Not mentioned	31	3 with desmoid, 1 with hemangiopericytoma, 2 with dermatofibrosarcoma protuberans, 1 with congenital/infantile fibrosarcoma, 1 with malignant fibrous histiocytoma, 3 with leiomyosarcoma, 1 with rhabdomyosarcoma (embryonal), 1 with rhabdomyosarcoma (alveolar), 3 with synovial sarcoma, 4 with well-differentiated liposarcoma, 1 with differentiated liposarcoma, 4 with myxoid liposarcoma, 2 with extra…	27 with TrkC (NTRK3) expression and 1 with Tel–TrkC fusion transcript	0	0	27 with TrkC (NTRK3) expression and 1 with Tel–TrkC fusion transcript	0	0	27 with TrkC (NTRK3) expression and 1 with Tel–TrkC fusion transcript	not mentioned	Not mentioned	Not mentioned	Not mentioned	Not mentioned		1	1	1	1	1	1	1	1	1	1	1	1	0	0	0	0	1	1	1	1	1	1	0	1
Cellular mesoblastic nephroma: morphologic, cytogenetic and molecular links with congenital fibrosarcoma	Henno, 2003	Not mentioned	France	Case report	Pediatrics	32 gestational weeks	1/1 (100%)	Molecular study, IHC, RT-PCR	spindle-shaped cells with marked nuclear pleomorphism and several mitotic figures	kidney (1)	1	1 with cellular congenital mesoblastic nephroma	1	0	0	1	0	0	Tel-ETV6/TrkC-NTRK3 (1)	nephrectomy (1)	1/1 responded to therapy	disease-free (1)	0 patient	5 years		1	1	0	1	1	1	1	1	1	1	1	1	0	0	0	0	1	1	1	1	1	1	1	1
Non-resectable congenital tumors with the ETV6-NTRK3 gene fusion are highly responsive to chemotherapy	McCahon, 2003	Not mentioned	Canada	Retrospective descriptive	Pediatrics	5.5 (±3) years	1/3 (33.33%)	RT-PCR	Cellular tumor comprised of spindle cells arranged in irregular fascicles(1) , spindle cell tumor with the cells arranged in a fascicular pattern(1) , tumor comprised of interweaving fascicles of spindle cells (1)	thigh (1), popliteal fossa (1), Right kidney (1)	3	2 with Infantile fibrosarcoma, 1 with atypical congenital mesoblastic nephroma	3	0	0	3	0	0	ETV6–NTRK3 (3)	Chemotherapy (VAC, ifosfamide, doxorubicin)	3/3 responded to therapy	Improved growth, development, and functionality	0 patients	5 to 9 years		1	1	0	1	1	1	1	1	1	1	1	1	0	0	0	0	1	1	1	1	1	0	0	0
Analyses of novel prognostic factors in neuroblastoma patients	Ootsuka, 2007	From 1990 to 2004	Japan	Retrospective descriptive	Pediatrics	Not mentioned	1/2 (50%)	qRT-PCR	Not mentioned	Not mentioned	2	2 with rhabdomyosarcomas	not mentioned	Not mentioned	Not mentioned	Not mentioned	Not mentioned	Not mentioned	Not mentioned	not mentioned	Not mentioned	Not mentioned	Not mentioned	Not mentioned		1	1	0	1	1	1	1	1	1	1	1	1	0	0	0	0	0	1	1	1	1	0	0	0
Congenital fibrosarcoma with a novel complex 3-way translocation t(12;15;19) and unusual histologic features	Mariño-Enríquez, 2008	Not mentioned	United States of America	Case report	Pediatrics	5 months	0/1 (0%)	karyotype, FISH	Primitive mesenchymal cellular proliferation with nodular arrangement, Spindle cells arranged in a nodular pattern with perivascular predilection	Retroperitoneum (1)	1	1 with retroperitoneal congenital fibrosarcoma	1	0	0	1	0	0	ETV6–NTRK3 (1)	Neoadjuvant chemotherapy followed by surgery	1/1 responded to therapy	patient is in good condition with small residual area	0 patients	7 months		1	1	0	1	1	1	1	1	1	1	1	1	0	0	0	0	1	1	1	1	1	1	0	0
Infantile fibrosarcoma of thigh--a case report	Himori, 2009	Not mentioned	Japan	Case report	Pediatrics	4 months	Not mentioned	RT-PCR	Multilobular appearance consisting of atypical short spindle or oval cells with hyperchromatic vesicular nuclei. Mitotic figures were present. They were arranged in a disorderly fashion or in short fascicles around variably gaping or ramifying, thin-walled blood vessels, showing a hemangiopericytoma-like appearance. Hemorrhage and hemo-siderin deposits were every so often seen with a mixture of c…	thigh (1)	1	1 with infantile fibrosarcoma	1	0	0	1	0	0	ETV6–NTRK3 (1)	surgical resection	1/1 responded to therapy	able to walk with limbing	0 patient	36 months		1	1	1	1	1	1	1	1	1	1	1	1	0	0	0	0	1	1	1	1	1	1	0	1
Mediators of receptor tyrosine kinase activation in infantile fibrosarcoma: a Children's Oncology Group study	Gadd, 2012	Not mentioned	United States of America	Retrospective descriptive	Pediatrics	Not mentioned	Not mentioned	RT-PCR, FISH, RT–MLP, IHC	Not mentioned	Not mentioned	14	12 with Congenital Mesoblastic Nephroma, 2 with infantile fibrosarcoma	7	0	0	7	0	0	ETV6–NTRK3 (7)	not mentioned	Not mentioned	Not mentioned	Not mentioned	Not mentioned		1	1	0	1	1	1	1	1	1	1	1	1	0	0	0	0	1	1	1	1	1	0	0	0
Cytogenetic and single nucleotide polymorphism array findings in soft tissue tumors in infants	Walther, 2013	From 1987 to 2011	Sweden	Retrospective descriptive	Pediatrics	6 (±2) months	Not mentioned	Chromosome banding, FISH, RT-PCR, SNP array	Not mentioned	head and neck, thorax, abdomen, pelvis, extremities, and skin (numbers not reported)	6	1 with embryonal rhabdomyosarcoma, 3 with infantile fibrosarcoma, 1 with nodular fibrohistiocytic tumor, and 1 with angiomatoid fibrous histiocytoma.	1	0	0	1	0	0	ETV6-NTRK3 (1)	not mentioned	Not mentioned	Not mentioned	not mentioned	0.5 to 11 years		1	1	0	1	1	1	1	1	1	1	1	1	0	0	0	0	0	0	1	1	1	1	0	0
Transcriptome sequencing identifies ETV6-NTRK3 as a gene fusion involved in GIST	Brenca, 2015	Not mentioned	Italy	Case series	Adults	51.6 (±25.9) years	4/5 (80%)	RT-PCR, FISH	Not mentioned	small intestine (4), rectum (1)	5	5 with gastrointestinal stromal tumor	1	0	0	1	0	0	ETV6-NTRK3 (1)	surgery (1)	1/1 responded to therapy	Not mentioned	0	44 months		1	1	0	1	1	1	1	1	1	1	1	1	0	0	0	0	1	1	1	1	1	0	0	0
Paediatric and adult soft tissue sarcomas with NTRK1 gene fusions: a subset of spindle cell sarcomas unified by a prominent myopericytic/haemangiopericytic pattern	Haller, 2016	Not mentioned	Germany	Retrospective descriptive	Both	33.5 (±33.6) years	2/4 (50%)	RT-PCR, FISH, RNA sequencing, whole-genome sequencing, western blot	Not mentioned	back (1), paravertebral lumbar (1), supraclavicular (1), upper arm (1)	4	2 with myopericytoma-like sarcoma, 1 with infantile haemangiopericytoma-like sarcoma, 1 with myofibroblastic sarcoma-like	3	3	0	0	TPM3-NTRK1 (2), LMNA-NTRK1 (1)	0	0	Complete excision (3/4), R2 excision with radiotherapy (1/4)	3/3 responded to therapy	Not mentioned	Not mentioned	24-32 months		1	1	0	1	0	0	0	1	0	1	1	1	0	0	0	0	1	1	1	1	1	0	0	0
FGFR1 and NTRK3 actionable alterations in Wild-Type" gastrointestinal stromal tumors"	Shi, 2016	From October 2012 to May 2015	United States of America	Retrospective descriptive	Both	Not mentioned	not mentioned	Comprehensive genomic profiling	Not mentioned	gastrointestinal tract (191)	191	191 with gastrointestinal stromal tumors	2	0	0	2	0	0	ETV6–NTRK3 (2)	chemotherapy (2/2), TRK inhibitor (LOXO-101) (1/2)	1/2 partial response	Not mentioned	Not mentioned	4-12 months		1	1	1	1	1	1	1	1	1	1	1	1	0	0	0	0	1	1	1	1	1	1	0	1
Infantile Fibrosarcoma With NTRK3-ETV6 Fusion Successfully Treated With the Tropomyosin-Related Kinase Inhibitor LOXO-101	Nagasubramanian, 2016	From 2015 to 2024	United States of America	Case report	Pediatrics	6 months	1/1 (100%)	FISH	Not mentioned	neck/skull (1)	1	1 with infantile fibrosarcoma	1	0	0	1	0	0	ETV6–NTRK3 (1)	LOXO-101, Chemotherapy with vincristine, actinomycin‐D, and cyclophosphamide	Partial response (1/1), patient experienced disease progression during cycle 1	Improved engagement and playfulness, fever, and influenza A (not related to therapy)	0 patients	5 cycles (not mentioned in months)		1	1	0	1	1	1	1	1	1	1	1	1	0	0	0	0	1	1	1	1	1	1	0	0
Evaluation of a Congenital Infantile Fibrosarcoma by Comprehensive Genomic Profiling Reveals an LMNA-NTRK1 Gene Fusion Responsive to Crizotinib	Wong, 2016	Not mentioned	Not mentioned	Case report	Pediatrics	8 months	Not mentioned	RT-PCR, FISH, DNA and RNA sequencing hybrid capture-based assay	Dense proliferation of spindle cells in herringbone pattern, mitotic rate up to 10 mitotic figures in a single high power field, positive CD34+ and vimentin staining	buttock (1)	1	1 with spindle cell sarcoma	1	1	0	0	LMNA-NTRK1 (1)	0	0	Crizotinib (80mg b.i.d.)	1/1 responded to therapy	recurrence & metastasis (1)	1 patient	7 months (ongoing)		1	1	1	1	1	1	1	1	1	1	1	1	0	0	0	0	1	1	1	1	1	1	0	0
Recurrent NTRK1 Gene Fusions Define a Novel Subset of Locally Aggressive Lipofibromatosis-like Neural Tumors	Agaram, 2017	From 1993 to 2015	United States of America	Retrospective descriptive	Both	Not mentioned	8/14 (0.57%)	FISH, IHC	Cellular spindle cell neoplasm	forearm (2), hand (1), antecubital (1), thigh (1), flank (1), arm (1), foot (1), scalp (1), leg (1)	14	14 with lipofibromatosis-Like Neural Tumors	10	6 fusion, 4 mutation	0	0	LMNA-NTRK1 (4), NTRK1 mutation (4), TPR-NTRK1 (1), TPM3-NTRK1 (1)	0	0	not mentioned	8/10 responded to therapy 2/10 not reported	no deaths or metastesis	3 patients	between 1 month and 85 months		1	1	0	1	1	1	1	1	1	1	1	1	0	0	0	0	0	1	1	1	1	0	0	0
Pan-Trk Immunohistochemistry Is an Efficient and Reliable Screen for the Detection of NTRK Fusions	Hechtman, 2017	Not mentioned	United States of America	Retrospective descriptive	Not mentioned	Not mentioned	Not mentioned	NGS, RNA testing, IHC	Not mentioned	Not mentioned	2	2 with sarcomas	2	1	0	1	LMNA-NTRK1 (1)	0	TPM4-NTRK3 (1)	not mentioned	Not mentioned	Not mentioned	Not mentioned	Not mentioned		1	1	0	1	1	1	1	1	1	1	1	1	0	0	0	0	1	1	1	1	1	0	0	0
A Case of Congenital Infantile Fibrosarcoma of the Bowel Presenting as a Neonatal Intussusception	Obayashi, 2017	Not mentioned	Japan	Case report	Pediatrics	4 days	1/1 (100%)	IHC, RT-PCR and genome sequencing	spindle atypical cells arranged in fascicles with lymphocytic inﬁltration and herring-bonefascicles. Eexpressed a collagenous matrix. Hemangiopericytoma-like vessel pattern was prominent. Rate of mitosis was 12 mitoses/10 HPFs.	ileocecal region (1)	1	1 with infantile fibrosarcoma	1	0	0	1	0	0	ETV6–NTRK3 (1)	surgical resection	1/1 responded to therapy	Not mentioned	0 patients	12 months		1	1	1	1	1	1	1	1	1	1	1	1	0	0	0	0	1	1	1	1	1	1	0	1
Identification of NTRK fusions in pediatric mesenchymal tumors	Pavlick, 2017	Not mentioned	United States of America	Case series	both	Not mentioned	Not mentioned	FISH, DNA and RNA sequencing (comprehensive genomic proﬁling)	Not mentioned	Not mentioned	7	2 with Infantile fibrosarcoma, 1 with fibrosarcoma, 1 with fibrosarcoma ex dermatofibrosarcoma protuberans, 1 with neuroectodermal tumor, 1 with inflammatory myofibroblastic tumor (IMT), and 1 with dendritic sarcoma.	7	4	0	3	SQSTM1-NTRK1 (1), LMNA-NTRK1 (2),TPR-NTRK1 (1)	0	TFG-NTRK3 (1), ETV6–NTRK3 (2)	not mentioned	Not mentioned	Not mentioned	Not mentioned	Not mentioned		1	1	1	1	1	1	1	1	1	1	1	1	0	0	0	0	1	1	1	1	1	1	0	1
Genomic Profiling of a Large Set of Diverse Pediatric Cancers Identifies Known and Novel Mutations across Tumor Spectra	Chmielecki, 2017	Not mentioned	United States of America	Retrospective descriptive	Pediatrics	Not mentioned	Not mentioned	NGS	Not mentioned	Not mentioned	324	63 with bone sarcoma, 66 with rhabdomyosarcoma, 39 with Ewing sarcoma, 37 with soft tissue sarcoma, 19 with soft tissue assorted, 18 with fibromatosis, 5 with angiosarcoma, 6 with fibrosarcoma, 6 with hemangioma, 7 with hemangioendothelioma, 10 with synovial sarcoma, 6 with alveolar soft part sarcoma, 7 with inflammatory myofibroblastic tumor, 14 with dermatofibrosarcoma protuberans, 11 with mali…	2	1	0	1	SQSTM1-NTRK1(1)	0	TFG-NTRK3 (1)	Not mentioned	Not mentioned	Not mentioned	Not mentioned	Not mentioned		1	1	0	1	1	1	1	1	1	1	1	1	0	0	0	0	0	1	1	1	1	0	0	0
Molecular characterization of cancers with NTRK gene fusions	Gatalica, 2018	From 2015 to 2018	United States of America	Retrospective descriptive	Adults	55 years	Not mentioned	NGS, IHC	Not mentioned	Not mentioned	478	1 with soft tissue sarcoma, 1 with uterine sarcoma, 476 not mentioned	2	1	0	1	TPM3-NTRK1 (1)	0	SPECC1L–NTRK3 (1)	not mentioned	Not mentioned	Not mentioned	Not mentioned	Not mentioned		1	0	0	1	1	1	1	1	1	1	1	1	0	0	0	0	0	1	1	1	1	0	0	0
Evaluation of pan-TRK immunohistochemistry in infantile fibrosarcoma, lipofibromatosis-like neural tumour and histological mimics	Hung, 2018	From 2006 to 2017	United States of America	Case series	Pediatrics	Not mentioned	Not mentioned	NGS, FISH, IHC	infantile fibrosarcoma: highly cellular sheets and intersecting fascicles of monomorphic ovoid to spindled cells, with small hyperchromatic nuclei arranged in a prominent herringbone pattern. In two cases, tumour cells were mixed with chronic inflammatory infiltrate; nuclei were elongated to round, with differing open chromatin and prominent nucleoli. Prominent haemangiopericytoma-like vessels wi…	lower limb (6), upper limb (4), truncal/abdominopelvic/paravertebral region (11) head and neck (5), sacrococcygeal region (1), inguinal region (3), the rest were not specified.	160	5 with Lipofibromatosis-like neural tumour, 5 with Lipofibromatosis, 10 with Primitive myxoid mesenchymal tumour of infancy, 10 with Low-grade myofibroblastic sarcoma, 15 with Infantile fibrosarcoma, 15 with Desmoid fibromatosis, 20 with Fibrosarcomatous dermatofibrosarcoma protuberans, 20 with Spindle-cell rhabdomyosarcoma, 20 with Synovial sarcoma, 20 with Malignant peripheral nerve sheath tumo…	28 with pan-TRK positive	Not mentioned	Not mentioned	Not mentioned	Not mentioned	Not mentioned	Not mentioned	not mentioned	Not mentioned	Not mentioned	Not mentioned	Not mentioned		1	1	1	1	1	1	1	1	1	1	1	1	0	0	0	0	1	1	1	1	1	1	0	1
Recurrent BRAF Gene Fusions in a Subset of Pediatric Spindle Cell Sarcomas: Expanding the Genetic Spectrum of Tumors With Overlapping Features With Infantile Fibrosarcoma	Kao, 2018	Not mentioned	United States of America, Canada, Turkey, Taiwan	Case series	Pediatrics	Not mentioned	6/10 (60%)	FISH, RT-PCR, RNA sequencing	1st NTRK fusion case: round, short and ovoid spindle cells arranged in nests and short fascicles, with areas of necrosis. The lesional cells showed small amount of eosinophilic cytoplasm and monomorphic nuclei with fine chromatin. Presence of mitotic figures (>10 MF/10HPFs). 2nd NTRK fusion case: monomorphic spindle cells arranged in long, intersecting fascicles and notable cleft-like vasculature…	Retroperitoneal (3), pelvis (2), spine extradural (1), thigh (1), extensor tendon of foot (1), forearm (1), lumbar (1)	10	9 with Infantile fibrosarcoma and 1 with unclassified low grade spindle cell sarcoma.	2	1	0	1	TPM3-NTRK1 (1)	0	EML4–NTRK3 (1)	not mentioned	Not mentioned	Not mentioned	Not mentioned	Not mentioned		1	1	1	1	0	0	1	1	1	1	1	1	0	0	0	0	1	1	1	1	1	1	0	1
A novel case of an aggressive superficial spindle cell sarcoma in an adult resembling fibrosarcomatous dermatofibrosarcoma protuberans and harboring an EML4-NTRK3 fusion	Olson, 2018	From 2010	United States of America	Case report	Adults	40 years	1/1 (100%)	RT-PCR, NGS	monomorphic spindle cells that entrapped adnexal structures and invaded the subcutaneous tissue in a honeycomb pattern. Plump and uniform nuclei were arranged in a storiform growth pattern, and had focal lympho-cytic infiltrates. Most of the tumor grew in a fascicular growth pattern with five mitotic figures/10HPFs. in some areas the cells exhibited a more epithelioid cytomorphology	back (1)	1	1 with dermatofibrosarcoma protuberans	1	0	0	1	0	0	EML4–NTRK3 (1)	surgical resection	1/1 responded to therapy	Metastasis (1)	1 patients	1 year		1	1	1	1	1	1	1	1	1	1	1	1	0	0	0	0	1	1	1	1	1	1	0	1
Pan-Trk Immunohistochemistry Identifies NTRK Rearrangements in Pediatric Mesenchymal Tumors	Rudzinski, 2018	Not mentioned	United States of America	Retrospective descriptive	Pediatrics	Not mentioned	Not mentioned	FISH, IHC, RT-PCR, NGS	Not mentioned	Not mentioned	65	31 with soft tissue sarcoma not otherwise specified, 2 with dermatofibrosarcoma protuberans, 5 with desmoid, 2 with Malignant Peripheral Nerve Sheath Tumor , 2 with synovial sarcoma, 2 with spindle cell rhabdomyosarcoma, 6 with Inflammatory Myofibroblastic Tumor , 1 with BCOR-rearranged sarcoma, 1 with undifferentiated pleomorphic sarcoma, 4 with high grade sarcoma, 5 with low-grade spindle cell …	23	12 fusion, 1 gene amplification	1	9	TPM3-NTRK1 (7), LMNA-NTRK1 (2), MIR548F1-NTRK1 (1), SQSTM-NTRK1 (1), TPR-NTRK1 (1), NTRK1 gene amplification (1)	STRN-NTRK2 (1)	EML4–NTRK3 (1), ETV6–NTRK3 (8)	not mentioned	Not mentioned	Not mentioned	Not mentioned	Not mentioned		1	1	1	1	1	1	1	1	1	1	1	1	0	0	0	0	1	1	1	1	1	1	0	1
Pediatric soft tissue tumor of the upper arm with LMNA-NTRK1 fusion	Kohsaka, 2018	From 2016	Japan	Case report	Pediatrics	6 years	1/1 (100%)	RT-PCR, RNA sequencing	spindle-shaped cells in the collagenous stoma. Scattered ganglion cell–like cells with lymphocytic infiltration.Cells with large bizarre shaped nuclei were some times seen, and multinucleated giant cells were spread at the periphery	elbow (1)	1	1 with unclassified tumor	1	1	0	0	LMNA-NTRK1 (1)	0	0	surgical resection	1/1 responded to therapy	Not mentioned	Not mentioned	10 months		1	1	0	1	1	1	1	1	0	0	1	1	0	0	0	0	1	1	1	1	1	1	0	1
Anaplastic lymphoma kinase-negative uterine Inflammatory myofibroblastic tumor of the uterus: clinical and pathologic review of 10 cases including a subset with aggressive clinical course	Takahashi, 2018	Not mentioned	Japan	Case report	Adult	44	1/1 (100%)	IHC and FISH	Proliferation of spindle cells embedded in a storiform pattern together with numerous lymphocytes, plasma cells, and histiocytes in variable amounts of myxoid matrix. Overall, mitotic activity was scant, and necrosis was absent.	uterus (1)	1	1 with inflammatory myofibroblastic tumor	1	0	0	1	0	0	ETV6-NTRK3 (1)	surgical removal only (total abdominal hysterectomy)	alive and no recurrencee	Not mentioned	0	31 months		1	1	1	1	1	1	1	1	1	1	1	1	0	0	0	0	1	1	1	1	1	1	1	1
A novel group of spindle cell tumors defined by S100 and CD34 co-expression shows recurrent fusions involving RAF1, BRAF, and NTRK1/2 genes	Suurmeijer, 2018	Not mentioned	Not mentioned	Retrospective descriptive	Both	28.6 (±20.9) years	13/25 (52%)	targeted RNA sequencing and/or FISH.	All tumors showed co-expression of S100 and CD34, rang- ing from focal to diffuse. SOX10 was negative in all cases. NTRK1 immunohistochemistry showed high levels of expression in all tumors with NTRK1 gene rearrangements. H3K27me3 expression performed in a subset of cases was retained.	limbs (14), Gastrointestinal tract (2), abdomen (1), Chest wall (4), back (2), Head (2)	25	25 with spindle cell neoplasm	15	14	1	0	LMNA-NTRK1 (8),TPM3-NTRK1 (3), TPR–NTRK1 (1), NTRK1-unknown fusion partner (2)	SPECC1L–NTRK2 (1)	0	surgery, radiation	9/25 No evidence of disease	Metastasis (3), death (2)	1 patient	3-375 months		1	1	0	1	1	1	1	1	1	0	1	1	0	0	0	0	0	1	1	1	1	0	0	0
Lipofibromatosis-like neural tumour: a clinicopathological study of ten additional cases of an emerging novel entity	Lao, 2018	From 2015 to 2017	China	Case series	Both	12.8 years	4/10 (40%)	FISH	In seven cases, the tumor was composed of dense fascicles or compact sheets of spindle cells that has infiltrated the subcutaneous adipose tissue. Some areas had a honeycomb infiltrative pattern. The tumor in the other three cases was composed mainly of fascicles of spindle cells separated by collagen fibres. On higher power, the spindled tumour cells displayed a mild to moderate degree of nuclea…	Left foot (1), Buttock (2), Right hip (1), Left neck (3), Right chest wall (1), Hand back (1), Left flank (1)	10	4 with lipofibromatosis-like neural tumour, 3 with infantile fibrosarcoma, 1 with peripheral nerve sheath tumour, and 2 with spindle cell sarcoma.	4 with NTRK1 rearrangment	4	0	0	NTRK1 rearrangment (4)	0	0	surgical resection	6/10 responded to therapy	Not mentioned	3 patients	3 to 32 months		1	1	0	1	1	1	1	1	0	1	1	1	0	0	0	0	1	1	1	1	1	1	0	0
A primary undifferentiated pleomorphic sarcoma of the lumbosacral region harboring a LMNA-NTRK1 gene fusion with durable clinical response to crizotinib: a case report	Zhou, 2018	Not mentioned	Not mentioned	Case report	Adults	45 years	0/1 (0%)	NGS	high-grade spindle cell sarcoma consistent with undifferentiated pleomorphic spindle cells surrounding an area of geographic necrosis with frequent atypical mitosis	Lumbosacral region/erector spinae/fifth lumbar vertebra/first sacral vertebra/iliac wing (1)	1	1 with spindle cell sarcoma	1	1	0	0	LMNA-NTRK1 (1)	0	0	Neoadjuvant radiotherapy, complete extensive resection, adjuvant chemotherapy with liposomal doxorubicin and ifosfamide, crizotinib therapy	1/1 responded to therapy	metastasis (1)	1 patient	Ongoing near-CCR of 18 months as of July 2018		1	1	1	1	1	1	1	1	1	1	1	1	0	0	0	0	0	1	1	1	1	1	0	0
Expression of neurotrophins and their receptors in primary osteosarcoma	Antunes, 2019	From 2002 to 2015	Brazil	Retrospective descriptive	Pediatrics	12.0 (±3.6) years	10/19 (52.6%)	IHC	Not mentioned	lower extremities (15), upper extremeties (2), pelvis (1)	19	19 with osteosarcoma	12 with IHC only	4 TrkA	8 TrkB	0	TrkA-NGF(4)	TrkB-BDNF (8)	0	chemotherapy	6/11 had good response. 8/11 not reported	12 metastesis and 7 localized	4 patients	median 2.7 yrs, ranging from 0.6-14 years		1	1	0	1	1	1	1	1	1	1	1	1	0	0	0	0	1	1	1	1	1	0	0	0
Refractory and metastatic infantile fibrosarcoma harboring LMNA-NTRK1 fusion shows complete and durable response to crizotinib	Bender, 2019	until May 2017	United States of America	Case report	Pediatrics	0 years	1/1 (100%)	RNA sequencing and DNA-based hybridization capture	Not mentioned	forearm (1)	1	1 with infantile fibrosarcoma	1	1	0	0	LMNA–NTRK1 (1)	0	0	crizotinib for 31 months	1/1 responded to therapy	Not mentioned	1 (but before treatment was given)	18 months		1	1	1	1	1	1	1	1	1	1	1	1	0	0	0	0	1	1	1	1	1	1	0	0
NTRK Fusions Define a Novel Uterine Sarcoma Subtype With Features of Fibrosarcoma	Chiang, 2019	From 2014 to 2017	United States of America	Case series	Adults	40.3 (±9.1) years	4/4 (100%)	RNA and DNA sequencing, NGS, FISH, IHC	4 cases with haphazard fascicles of spindle cells with intermediate-sized nuclei, clumped chromatin, small nucleoli, and abundant eosinophilic cytoplasm	uterine cervix (3), uterine corpus (1)	4	4 with undifferentiated uterine sarcomas	4	3	0	1	LMNA-NTRK1 (1), TMP3-NTRK1 (1), TPR-NTRK1 (1)	0	RBPMS-NTRK3 (1)	surgery (2), surgery and chemotherapy (2)	disease free (2), alive with disease (1), died of disease (1)	death (1)	2 patients	2 to 74 months		1	1	0	1	1	1	1	1	1	1	1	1	0	0	0	0	1	1	1	1	1	0	0	0
Uterine and vaginal sarcomas resembling fibrosarcoma: a clinicopathological and molecular analysis of 13 cases showing common NTRK-rearrangements and the description of a <i>COL1A1</i>-<i>PDGFB</i> fusion novel to uterine neoplasms	Croce, 2019	Not mentioned	France, United States of America, United Kingdom	Retrospective descriptive	Adults	41 (±16) years	13/13 (100%)	RNA and DNA sequencing, RT-PCR, FISH, IHC	spindle-shaped cells with ovoid nuclei, inapparent nucleoli and scant cytoplasm.	uterine cervix (10), uterine corpus (2), vagina (1)	13	13 with spindle cell sarcomas	7	6	0	1	TPM3-NTRK1 (6)	0	EML4-NTRK3 (1)	not mentioned	Not mentioned	Not mentioned	6 patients	Not mentioned		1	0	0	1	1	1	1	1	1	1	1	1	0	0	0	0	0	1	1	1	1	0	0	0
Resected High-Risk Rectal GIST Harboring NTRK1 Fusion: a Case Report and Review of the Literature	D’Alpino Peixoto, 2019	From March 2019	Brazil	Case report	Adults	20 years	0/1 (0%)	NGS	Not mentioned	rectum (1)	1	1 with gastrointestinal stromal tumor	1	1	0	0	LMNA-NTRK1 (1)	0	0	rectosigmoidectomy followed by active surveillance (1)	Not mentioned	Not mentioned	Not mentioned	Not mentioned		1	1	0	1	1	1	1	1	1	1	1	1	0	0	0	0	1	1	1	1	1	1	1	1
Expanding the Spectrum of Pediatric NTRK-rearranged Mesenchymal Tumors	Davis, 2019	From 1990 to 2017	United States of America	Retrospective descriptive	Pediatrics	4 months	14/30 (46.6%)	NGS, DNA sequencing, FISH, IHC	primitive spindle cell pattern, a fascicular/herringbone pattern, myoid appearance, significant intratumoral heterogeneity with multiple morphologic patterns present within a single tumor	lower limbs (9), upper limbs (8), abdomen (1), pelvis (2), retroperitoneal (2), trunk (2), back (1), dural (1), lung (1), paraspinal (1)	28	15 with infantile fibrosarcoma, 5 with low-grade spindle cell sarcoma, 4 with unclassified tumor, 2 with spindle and round cell sarcoma, 1 with spindle cell sarcoma, 1 with myxoid dermatofibrosarcoma protuberans	28	14	1	13	TPM3-NTRK1 (8), LMNA-NTRK1 (2), MIR548F1-NTRK1 (1), SQSTM1-NTRK1 (1), TPR-NTRK1 (1), NTRK1 (1)	STRN-NTRK2 (1)	ETV6-NTRK3 (12), EML4-NTRK3 (1)	larotrectinib (10/28), chemotherapy (12/27), excision (12/27), biospy (8/27), debulking (4/28), amputation (2/28)	disease free (13), alive with the disease (10), lost to follow-up (5), died (2)	metastesis (6/27)	Not mentioned	0.5 to 11 years		1	1	0	1	1	1	1	1	1	1	1	1	0	0	0	0	0	0	1	1	1	0	1	1
NTRK-rearranged mesenchymal tumour in a 3-year-old female: a diagnostic quandary	Warren, 2019	Not mentioned	United States of America	Case report	Pediatrics	3 years	1/1 (100%)	NGS	Mature adipose tissue was present at the margin of the tumour with a ‘honeycomb’ appearance. The tumour consisted of hypercellular spindle cells with elongated nuclei without cytological atypia. fibroblastic cells with a frequent storiform pattern. some areas showed haemangiopericytoma (HPC)-like thin-walled vessels. mitoses bodies were present (2–5 per high-power field (HPF)). Rare scattered sma…	back (1)	1	1 with NTRK rearranged mesenchymal tumour	1	1	0	0	LMNA-NTRK1 (1)	0	0	surgical resection	1/1 responded to therapy	Not mentioned	Not mentioned	18 months		1	1	0	1	1	1	1	1	1	1	1	1	0	0	0	0	1	1	1	1	1	1	1	1
Novel NTRK3 Fusions in Fibrosarcomas of Adults	Yamazaki, 2019	Not mentioned	Japan	Case series	Adults	Not mentioned	1/2 (50%)	RNA sequencing, RT-PCR, Sanger sequencing, FISH	Nonpleomorphic spindle cells in fascicales with a storiform pattern and alternating dense and hypodense patterns with myxoid/edematous stroma. Mild nuclear atypia was present. Mitotic figures ranges from 3-12/10 high-power fields. morever, one tumor had a focal herring bone pattern in addition to areas of necrosis.	forearm (1), thigh (1)	2	2 with adult type fibrosarcoma	2	0	0	2	0	0	STRN-NTRK3 (1), STRN3-NTRK3 (1)	surgical resection, radiotherapy, chemotherapy	Not mentioned	Metastasis (2), death (1)	Not mentioned	29-113 months		1	1	0	1	1	1	1	1	1	1	1	1	0	0	0	0	0	1	1	1	1	0	1	1
NTRK fusion detection across multiple assays and 33,997 cases: diagnostic implications and pitfalls	Solomon, 2019	From 2014 to 2019	United States of America	Retrospective descriptive	Both	Not mentioned	Not mentioned	DNA based NGS (MSK-IMPACT), RNA sequencing assay (MSKFusion)	Not mentioned	Various locations, including salivary gland, thyroid, sarcoma, lung, etc.	1915	Not mentioned	13	9	0	4	LMNA-NTRK1 (4), TPM3-NTRK1 (3), TPR-NTRK1 (1), PEAR-NTRK1 (1)	0	ETV6-NTRK3 (2), TPM4-NTRK3 (1), EEF1A1-NTRK3 (1)	not mentioned	Not mentioned	Not mentioned	Not mentioned	Not mentioned		1	1	0	1	1	1	1	1	1	1	1	1	0	0	0	0	0	1	1	1	1	0	0	0
The histologic spectrum of soft tissue spindle cell tumors with NTRK3 gene rearrangements	Suurmeijer, 2019	Not mentioned	Not mentioned	Retrospective descriptive	Both	20 (±16.5) years	5/7 (71%)	FISH, targeted RNA sequencing, anchored multiplex RNA sequencing, MSK-IMPACT assay	Wide histologic spectrum including low- to high-grade spindle cell sarcomas with various features	Thigh (1), popliteal (1), abdomino-pelvic (1), retroperitoneal (1), paraspinal (1), foot (1), mesentery (1).	7	Not mentioned	7	0	0	7	0	0	TPM4-NTRK3 (1), ETV6-NTRK3 (1), TFG-NTRK3 (1), EML4-NTRK3 (1), NTRK3-unknown fusion partner (3)	all sugically removed	3/7 responded to therapy, 2/7 outcome was not reported	death (1)	Not mentioned	average of 11.4 months and up to 38 months		1	1	0	1	1	1	1	1	1	1	1	1	0	0	0	0	1	1	1	1	1	0	0	0
NTRK fusions in osteosarcoma are rare and non-functional events	Ameline, 2020	Not mentioned	Sweden	Retrospective descriptive	Both	Not mentioned	3/3 (100%)	RNA sequencing, RT-PCR, and Sanger sequencing validation	Not mentioned	Not mentioned	113	113 with osteosarcoma	3	0	1	2	0	UFD1-NTRK2 (1)	VPS18-NTRK3 (1), RALGPS2-NTRK3 (1)	none	Not mentioned	Not mentioned	Not mentioned	Not mentioned		1	1	0	1	1	1	1	1	1	1	1	1	0	0	0	0	1	1	1	1	1	0	0	0
Unusual Colonic Polyp in a Young Woman	Bertolini, 2020	Not mentioned	Switzerland	Case report	Adults	25 years	1/1 (100%)	NGS	Not mentioned	colon (1)	1	1 with spindle cell neoplasm	1	1	0	0	TMP3-NTRK1 (1)	0	0	complete mesocolic excision	Not mentioned	Not mentioned	Not mentioned	Not mentioned		1	1	1	1	1	1	1	1	1	1	1	1	0	0	0	0	1	0	1	1	1	1	0	0
TMP3-NTRK1 rearranged uterine sarcoma: A case report	Boyle, 2020	Not mentioned	United Kingdom	Case report	Adults	42 years	1/1 (100%)	NGS	Small inactive gland entrapped by neoplastic spindle cells with hyperchromatic nuclei.	Uterine cervix (1)	1	1 with uterine sarcoma	1	1	0	0	TPM3-NTRK1 (1)	0	0	hysterectomy then adjuvant pelvic radiotherapy and brachytherapy	1/1 responded to therapy	Not mentioned	0	11 months		1	1	0	1	1	1	1	1	1	1	1	1	0	0	0	0	1	1	1	1	1	1	0	0
A newborn with a large NTRK fusion positive infantile fibrosarcoma successfully treated with larotrectinib	Caldwell, 2020	Not mentioned	United States of America	Case report	Pediatrics	17 days	0/1 (0%)	RT-PCR	Not mentioned	arm (1)	1	1 with infantile fibrosarcoma	1	0	0	1	0	0	ETV6-NTRK3 (1)	larotrectinib (1)	1/1 responded to therapy	Not mentioned	Not mentioned	Not mentioned		1	1	1	1	1	1	1	1	1	1	1	1	0	0	0	0	1	1	1	1	1	1	1	0
Larotrectinib followed by selitrectinib in a novel DCTN1-NTRK1 fusion undifferentiated pleomorphic sarcoma	Goh, 2020	Not mentioned	Singapore	Case report	Pediatrics	14 years	0/1 (0%)	NGS, IHC	Not mentioned	abdominal wall (1)	1	1 with undifferentiated pleomorphic sarcoma	1	1	0	0	DCTN1–NTRK1 (1)	0	0	chemotherapy, radiotherapy, resection, then Crizotinib, larotrectinib followed by selitrectinib (1)	progressive disease (1)	progressive disease (1)	1 patient	Not mentioned		1	1	0	1	1	1	1	1	1	1	1	1	0	0	0	0	1	1	1	1	1	1	1	1
Clinicopathological findings of pediatric NTRK fusion mesenchymal tumors	Kang, 2020	From 2002 to 2019	South Korea	Case series	Pediatrics	Not mentioned	2/9 (22.2%)	FISH, NGS	Undifferentiated sarcoma: mixed oval to spindle cells, Infantile fibrosarcoma: Spindle cells intermixed with or without lymphoplasma cells, Inflammatory myofibroblastic tumor: Spindle myofibroblastic cells with lymphoplasma cells	Dura (1), dermis and subcutaneous tissue (1), tongue (1), buttock (1), shoulder (1), foot (1), abdominal cavity (1), and sacrococcygeal area(1), lung (1)	9	1 with undifferentiated sarcoma, 7 with Infantile fibrosarcoma, and 1 with Inflammatory myofibroblastic tumor.	9	2	0	7	TPR-NTRK1 (1), LMNA-NTRK1 (1)	0	ETV6–NTRK3 (7)	surgical resection ± chemotherapy	8/9 responded to therapy	Not mentioned	Not mentioned	4 months to 17 years		1	1	1	1	1	1	1	1	1	1	1	1	0	0	0	0	1	1	1	1	1	1	0	1
Undifferentiated and Unresectable Sarcoma with NTRK3-Fusion in a Pediatric Patient Treated with Larotrectinib and Proton Beam Radiotherapy	Olsen, 2020	Not mentioned	United States of America	Case report	Pediatrics	6 years	1/1 (100%)	IHC, FISH	spindle cells arranged in short fasciles and sheets, in a loose fibrous stroma. Cells have moderate amount of eosinophilic cytoplasm, ovoid hyperchromatic nuclei and irregular nuclear boarders. There is moderate to focal nuclear pleomorphism and increased mitotic activity (10MF/HPFs).	pelvis-abdomen (1)	1	1 with undifferentiated spindle cell sarcoma	1 with NTRK3 gene rearrangement	0	0	1 with NTRK3 gene rearrangement	0	0	NTRK3 gene rearrangement (1)	chemotherapy, radiationm and TRK inhibitor (larotrectinib)	1/1 responded to therapy	Not mentioned	0 patients	9 months		1	1	1	1	1	1	1	1	1	1	1	1	0	0	0	0	1	1	1	1	1	1	0	1
LMNA-NTRK1 rearranged mesenchymal tumor (lipofibromatosis-like neural tumor) mimicking pigmented dermatofibrosarcoma protuberans	Panse, 2020	Not mentioned	United States of America	Case report	Adults	31 years	1/1 (100%)	FISH, Targeted RNA sequencing	fascicles composed of relatively bland spindle cells within the dermis and subcutaneous tissue. The spindle cells infiltration into the adipose tissue in a “honeycomb pattern.” Lymphoid aggregates with germinal centers were spread between the spindle cells. Pigmented cells with long dendritic processes found in upper dermis	scalp (1)	1	1 with lipofibromatosis-like neural tumor	1	1	0	0	LMNA-NTRK1 (1)	0	0	surgical resection	1/1 responded to therapy	Not mentioned	0 patients	24 months		1	1	1	1	1	1	1	1	1	1	1	1	0	0	0	0	1	1	1	1	1	1	0	1
NTRK fusion cervical sarcoma: a report of three cases, emphasising morphological and immunohistochemical distinction from other uterine sarcomas, including adenosarcoma	Rabban, 2020	Not mentioned	United States of America	Case series	Adults	Not mentioned	22/22 (100%)	IHC, NGS	The mucosal surface of the tumours is polypoid. The tumour cells entrap native endocervical glands particularly in polypectomy specimens, versus a pure mesenchymal tumour that shows interglandular growth in another. Tumour cellularity is uniform, and there is no periglandular stromal condensation.	cervix (3), uterus (19)	22	3 with cervical sarcoma, 19 with uterine adenosarcomas	3	2	0	1	TPR-NTRK1 (1), TPM3-NTRK1 (1)	0	SPECC1L–NTRK3 (1)	surgical resection or chemotherapy, radiation, and TRK inhibitor (larotrectinib)	3/3 responded to therapy	Metastasis (1)	0 patients	6 months to 15 months		1	1	1	1	1	1	1	1	1	1	1	1	0	0	0	0	1	1	1	1	1	1	0	1
Myxoid Spindle Cell Sarcoma With LMNA-NTRK Fusion: Expanding the Morphologic Spectrum of NTRK-Rearranged Tumors	So, 2020	From 2012	China	Case report	Adults	40 years	1/1 (100%)	IHC, FISH, NGS	spindle cells of low to moderate cellularity with pushing invasive borders and focal vascular invasion. The monomorphic spindle cells formed fascicles and reticular networks, within myxoid stroma. The tumor cells had oval to elongated nuclei, indistinct nucleoli, fine chromatin, and a amount of eosinophilic cytoplasm. Hyalinized stromal and perivascular fibrosis could be found in some areas. The …	calf (1)	1	1 with myxoid spindle cell sarcoma	1	1	0	0	LMNA-NTRK1 (1)	0	0	surgical resection and radiotherapy	1/1 responded to therapy	Metastasis (1)	0 patients	6 years		1	1	1	1	1	1	1	1	1	1	1	1	0	0	0	0	1	1	1	1	1	1	1	1
Chromosomal imbalances detected in NTRK-rearranged sarcomas by the use of comparative genomic hybridisation	Vargas, 2020	Not mentioned	Australia	Case series	Adults	47.7 (±15.2) years	4/6 (66.7%)	Array comparative genomic hybridization, NGS, FISH, and pan TRK IHC	IMT-like: spindled histiocytoid cells with mild pleomorphism and a lymphoplasmacytic infiltrate; MPNST-like; cellular spindle tumour with alternate hypocellular myxoid and pleomorphic areas; Fibrosarcoma-like sarcoma; areas of lower cellularity in a myxoid background; focal necrosis; Spindle and epithelioid cell sarcoma; alternating moderate to high cellularity and pleomorphism; 23 mitoses/10 HPF…	liver (1), subcutaneous (1), thyroid (1), lung (1), uterine cervix (1), toe (1)	6	2 with inflammatory myofibroblastic-like tumour, 1 with Ewing sarcoma, 1 with fibrosarcoma-like tumor, 1 with lung spindle and epithelioid cell sarcoma, and 1 with uterine malignant peripheral nerve sheath tumour-like sarcoma.	4 fusion, 2 rearrangement	1	1	2 fusion, 2 gene rearrangment	TPM3-NTRK1 (1)	MTMR2–NTRK2 (1)	ETV6–NTRK3 (2), NTRK3 rearrangement (2)	surgery and chemotherapy (1), surgery (1), larotrectinib only (1), chemoradiotherapy (1), adjuvant radiotherapy then entrectinib (1)	3/6 complete response, 2/6 partial reponse	Recurrence and death (1), Metastasis (1)	2 patients	6 months to 7 years		1	1	1	1	1	1	1	1	1	1	1	1	0	0	0	0	1	1	1	1	1	0	0	0
Recurrent SPECC1L-NTRK fusions in pediatric sarcoma and brain tumors	Khuong-Quang, 2020	Not mentioned	Australia	Case series	Pediatrics	11 months	1/1 (100%)	Whole-genome sequencing, RNA sequencing.	Infantile fibrosarcoma consisted of intersecting fascicles of packed spindle cells with scant eosinophilic to amphophilic cytoplasm. Fibrocollagenous stroma infiltrated with tumor cells. Tumor cells had eosinophilic to vacuolated cytoplasm.	Chest (1)	1	1 with congenital infantile fibrosarcoma	1	0	0	1	0	0	SPECC1L–NTRK3 (1)	surgical resection, chemotherapy, TRK inhibitor (Larotrectinib)	complete response (1/1)	Not mentioned	Not mentioned	22 months		1	1	1	1	1	1	1	1	1	1	1	1	0	0	0	0	1	1	1	1	1	0	0	0
A Case of Inv(1)(q23q31) TPR-NTRK1 Fusion-Positive Spindle Cell Neoplasm in an Infant-Uncovered by Next-Generation Sequencing: Diagnostic Challenge, Review, and Therapeutic Implications	Rekhi, 2020	Not mentioned	India	Case report	Pediatrics	1 years	0/1 (0%)	NGS-based targeted panel, FISH	a cellular spindle cell tumor with cells arranged in fascicles and in a diffuse, infiltrative manner	neck (1)	1	1 with spindle cell sarcoma	1	1	0	0	TPM3-NTRK1 (1)	0	0	Chemotherapy (vincristine, cyclophosphamide, and dactinomycin)	0/1 responded to therapy	rapid increase in tumor size, leading to obstructive symptoms, death	1 patient	1 month		1	1	0	1	1	1	1	1	1	1	1	1	0	0	0	0	1	1	1	1	1	1	0	0
Abstract 38: Large-scale study of NTRK fusions in Chinese solid tumors and using next generation sequencing: A multicenter study	Wang, 2020	From 2013 to 2018	China	Retrospective cohort	Both	Not mentioned	Not mentioned	NGS	Not mentioned	Not mentioned	312	Not mentioned	11	4	0	7	LMNA-NTRK1 (3), TPM3-NTRK1 (1)	0	ETV6-NTRK3 (7)	Not mentioned	Not mentioned	Not mentioned	Not mentioned	Not mentioned	data extracted from asbtract
Mesenchymal tumors of the gastrointestinal tract with NTRK rearrangements: a clinicopathological, immunophenotypic, and molecular study of eight cases, emphasizing their distinction from gastrointestinal stromal tumor (GIST)	Atiq, 2021	Not mentioned	United States of America	Retrospective descriptive	Both	Not mentioned	3/6 (50%)	DNA and RNA sequencing, FISH, IHC	2 cases with monomorphic proliferations of small spindled cells, with inconspicuous cytoplasm and round-to-ovoid nuclei with regular contours and fine chromatin, arranged in dense sheets or in vague fascicles, 1 case with monomorphic proliferation of bland spindled cells haphazardly arranged , 1 case with dense and regionally heterogeneous proliferation of spindled cells, with limited nuclear aty…	small bowel (3), stomach (1), rectum (1), and mesentery (1)	6	4 with unclassified mesenchymal tumors, 2 with infantile fibrosarcoma	6	4	0	2	TPM3–NTRK1 (2), LMNA–NTRK1 (1), TPR–NTRK1 (1)	0	ETV6–NTRK3 (1), SPECC1L–NTRK3 (1)	1 on TRK inhibitors and 1 on larotrectinib	2/2 responded to therapy but one with metastesis	Of the two morphologically high-grade tumors, one patient has been sequentially enrolled in clinical trials of TRK inhibitors; she is alive, with metastatic disease, 50 months after initial diagnosis. Patient 8, a 7-year old boy treated with larotrectinib, has no evidence of disease after 3.5 months of follow-up; repeat CT and PET scans did not identify new lesion	Not mentioned	between 2 to 50 months		1	1	0	1	1	1	1	1	1	1	1	1	0	0	0	0	0	0	1	1	1	0	0	0
Broadening the spectrum of NTRK rearranged mesenchymal tumors and usefulness of pan-TRK immunohistochemistry for identification of NTRK fusions	Brčić, 2021	From 1999 to 2019	Austria	Retrospective cohort	Both	Not mentioned	Not mentioned	NGS, IHC	Not mentioned	Lower leg (2), forearm (1),lung (1), neck (1), others not specified	491	116 with myxofibrosarcomas, 82 with soft tissue and uterine leiomyosarcomas, 55 with undifferentiated pleomorphic sarcomas, 45 with synovial sarcomas, 37 with myxoid liposarcomas, 34 with atypical lipomatous tumors/well-differentiated liposarcomas, 34 with dedifferentiated liposarcomas, 19 with dermatofibrosarcoma protuberans, 12 with low-grade fibromyxoid sarcomas, 10 with angiosarcomas, 8 with …	4	2	0	2	LMNA-NTRK1 (1), TMB3-NTRK1 (1)	0	ETV6-NTRK3 (1), RBPMS - NTRK3 (1)	the patient with IFS had four months chemotherapy (the combination of vincristine and actinomycin D) followed by a TRK inhibitor (Entrectinib) for over 12 months. 1 patient with LPFNT and 1 patient with low grade spindle cell sarcoma received total resection. 1 patient with high grade sarcoma recieved total resction with adjuvant treatment, including irradiation and chemotherapy with Epirubicin/I…	4/4 responded to therapy	disease free (4)	0	4-20 months		1	1	0	1	1	1	1	1	1	1	1	1	0	0	0	0	0	0	1	1	1	0	0	0
Novel fusion sarcomas including targetable NTRK and ALK	Chen, 2021	From 2020 to 2021	United States of America	Case series	Both	18 years	4/6 (66.7%)	RNA-based NGS	1 case with large spindled pleomorphic tumor, 1 case with abundant necrosis rhabdoid/epithelioid morphology, 1 case with an infiltrative, uniform spindled to ovoid myopericytoid or lipofibromatosis-like process with bland cells, 1 case with abundant necrosis and stromal myxoid change, 1 case with round cell pattern with staghorn vasculature, necrosis, rare stromal and perivascular collagen, and f…	chest wall (1), hand (1), femur (1), paraspinal neck (1), tibia (1), thigh (1)	6	2 with Ewing sarcoma, 1 with osteosarcoma, 1 with unspecified high-grade malignant neoplasm, 1 with lipofibromatosis-like features, 1 with malignant solitary fibrous tumor	2	1	1	0	TPR-NTRK1 (1)	KANK1-NTRK2 (1)	0	larotrectinib (1), chemotherapy (1)	1/1 responded to therapy	metastesis (1)	Not mentioned	3 and 5 months		1	1	0	1	1	1	1	1	1	1	1	1	0	0	0	0	0	0	1	1	1	0	0	0
Unclassified mesenchymal sarcoma with NTRK1-KHDRBS1 gene fusion: a case report of long-term tumor-free survival with crizotinib treatment	Chen, 2021	From 2016	China	Case report	Adults	34 years	0/1 (0%)	NGS	1 case with abundant cell, with no tumor cells invading the epidermal layer of the skin	scalp (1)	1	1 with unclassified mesenchymal sarcoma	1	1	0	0	NTRK1-KHDRBS1 (1)	0	0	Crizotinib	1/1 responded to therapy	Not mentioned	0	44 months		1	1	1	1	1	1	1	1	1	1	1	1	0	0	0	0	1	1	1	1	1	1	0	0
Case report: NTRK1-rearranged cervical sarcoma with fibrosarcoma like morphology presenting in a 13-year-old managed with a neo-adjuvant TRK-inhibitor and surgical excision	Goulding, 2021	Not mentioned	New Zealand	Case report	Pediatrics	13 years	1/1 (100%)	NGS, FISH, IHC	monomorphic, mitotically- active spindle cells with a fascicular and herring-bone architecture	vagina (1)	1	1 with high-risk rhabdomyosarcoma	1	1	0	0	TPM3-NTRK1 (1)	0	0	Chemotherapy then entrectinib	1/1 responded to therapy	disease-free (1)	0 patient	Not mentioned		1	1	0	1	1	1	1	1	1	1	1	1	0	0	0	0	1	1	1	1	1	1	1	1
NTRK-rearranged Cervical Sarcoma: Expanding the Clinicopathologic Spectrum	Hodgson, 2021	Not mentioned	Canada	Case report	Adults	Not mentioned	1/1 (100%)	NGS	Not mentioned	uterine cervix (1)	1	1 with cervical sarcoma	1	0	0	1	0	0	SPECC1L–NTRK3 (1)	surgical resection	Not mentioned	Not mentioned	Not mentioned	Not mentioned	data extracted from asbtract
Expanding the Spectrum of Adult NTRK3-Rearranged Spindle Cell Neoplasms: A Recurrent NTRK3-SQSTM1 Fusion Spindle Cell Tumor With Deceptively Bland Morphology	Punjabi, 2021	Not mentioned	Singapore	Case report	Adults	70 years	1/1 (100%)	IHC, RT-PCR and Sanger sequencing	Hypocellular proliferation of bland spindle cells with a patternless growth pattern and set in a fibrous to edematous stroma. Blood vessels showed mild perivascular hyalinization and scattered lymphoid aggregates. Entrapped lobules of mature adipocytes were present. No significant cytologic atypia, necrosis, or increased mitoses was present	ankle (1)	1	1 with NTRK3-SQSTM1 Fusion Spindle Cell Tumor	1	0	0	1	0	0	SQSTM1-NTRK3 (1)	surgical resection	1/1 responded to therapy	Not mentioned	Not mentioned	42 months		1	1	1	1	1	1	1	1	1	1	1	1	0	0	0	0	1	1	1	1	1	1	0	1
NTRK fusions are extremely rare in bone tumours	Lam, 2021	Not mentioned	Netherlands	Retrospective descriptive	Not mentioned	Not mentioned	Not mentioned	Pan-trk IHC	Not mentioned	Not mentioned	381	137 with conventional chondrosarcoma, 36 with dedifferentiated chondrosarcoma, 20 with clear cell chondrosarcoma, 19 with mesenchymal chondrosarcoma, 123 with osteosarcoma, 26 with angiosarcoma, 20 with Ewing sarcoma.	17 pan trk ihc positive	Not mentioned	Not mentioned	Not mentioned	Not mentioned	Not mentioned	Not mentioned	Not mentioned	Not mentioned	Not mentioned	Not mentioned	Not mentioned		1	1	1	1	1	0	0	1	0	1	1	1	0	0	0	0	0	1	1	1	1	0	0	0
Isolated Leptomeningeal Progression in a Patient with NTRK Fusion plus Uterine Sarcoma: A Case Report	Lanman, 2021	From 2015	United States of America	Case report	Adults	29 years	1/1 (100%)	NGS	Not mentioned	uterus (1)	1	1 with Uterine sarcoma	1	0	0	1	0	0	SPECC1L-NTRK3 (1)	chemotherapy, radiotherapy, TRK inhibitor (larotrectinib, entrectinib)	Not mentioned	Metastasis (1)	Not mentioned	5 years		1	1	0	1	1	1	1	1	1	1	1	1	0	0	0	0	1	1	1	1	1	1	0	0
Calcified chondroid mesenchymal neoplasms with FN1-receptor tyrosine kinase gene fusions including FGFR2, FGFR1, MERTK, NTRK1, and TEK: a molecular and clinicopathologic analysis	Liu, 2021	Not mentioned	United States of America	Retrospective descriptive	Adults	54 (±16.4) years	5/8 (62.5%)	Targeted RNA sequencing, RT-PCR, Sanger sequencing	Multinodular architecture with chondroid matrix, coarse or grungy calcifications, CPPD deposition, TGCT-like features	TMJ/temporal bone (4), hand/digits (3), foot (1)	8	5 with Chondroid tenosynovial giant cell tumor, 1 with Chondroid neoplasm of synovium, 1 with Atypical chondroid neoplasm, 1 with Giant cell-rich lesion with chondroid stroma	1	1	0	0	FN1-NTRK1 (1)	0	0	Surgical excision	Not mentioned	No recurrence or metastasis reported	0 patients	1.7 years		1	1	0	1	1	1	1	1	1	1	1	1	0	0	0	0	1	1	1	1	1	0	0	0
Larotrectinib in a NTRK-rearranged soft tissue sarcoma in the neoadjuvant setting: A case report	Percy, 2021	Not mentioned	Belgium	Case report	Adults	30 years	0/1 (0%)	NGS	CD34 and S100 co-expressing spindle cell tumor morphologically resembling lipofibromatosis-like neural tumor variant	Distal left leg/Kager space/posterior cortical of the tibia/left Achilles tendon (1)	1	1 with soft tissue spindle cell sarcoma	1	1	0	0	SPECC1L-NTRK1 (1)	0	0	Larotrectinib	1/1 responded to therapy	Disease-free, able to walk adequately, living normal life	0 patients	3 months		1	1	0	1	1	1	1	1	1	1	1	1	0	0	0	0	1	1	1	1	1	1	0	0
Potential application of genomic profiling for the diagnosis and treatment of patients with sarcoma	Xu, 2021	From 2008 to 2018	China	Retrospective cohort	Both	50 years	94/199 (47.24%)	NGS	Not mentioned	Not mentioned	195	23 with gastrointestinal stromal tumors, 22 with osteosarcomas, 14 with liposarcomas, 13 with leiomyosarcomas, 12 with myxofibrosarcomas, 9 with synovial sarcomas, 7 with Ewing's sarcomas, 5 with chondrosarcomas, 5 with rhabdomyosarcomas, 5 with aggressive fibromatosis, 4 with angiosarcomas, 4 with dermatofibrosarcoma protuberans, 4 with undifferentiated pleomorphic sarcomas, 2 with epithelioid h…	6 fusions, 5 gene amplifications	2 fusions, 4 gene amplification	0	4 fusions, 1 gene amplification	LMNA-NTRK1 (1), IRF2BP2-NTRK1 (1), NTRK1 amplification (4)	0	MEF2A-NTRK3 (1), ITFG1-NTRK3 (1), ETV6-NTRK3 (2), NTRK3 amplification (1)	not mentioned	Not mentioned	Not mentioned	1 patient	Not mentioned		1	1	0	1	1	1	1	1	1	1	1	1	0	0	0	0	0	1	1	1	1	0	0	0
Abstract 2285: The capability of NTRK fusion detection by next-generation sequencing/FISH/IHC in 25976 solid tumor patients	Peng, 2021	From January 2017 to June 2020	China	Retrospective descriptive	Both	Not mentioned	Not mentioned	Targeted NGS, FISH, IHC	Not mentioned	Not mentioned	547	Not mentioned	3	Not mentioned	Not mentioned	Not mentioned	Not mentioned	Not mentioned	Not mentioned	Not mentioned	Not mentioned	Not mentioned	Not mentioned	Not mentioned	data extracted from asbtract
A novel TMTC2-NTRK3 fusion in undifferentiated high-grade pleomorphic sarcoma	Bai, 2022	From May 2019	China	Case report	Adults	69 years	0/1 (0%)	NGS, FISH, IHC	Not mentioned	chest wall (1)	1	1 with undifferentiated high-grade pleomorphic sarcoma	1	0	0	1	0	0	TMTC2-NTRK3 (1)	radiotherapy	Not mentioned	Not mentioned	Not mentioned	Not mentioned		1	1	1	1	1	1	1	1	1	1	1	1	0	0	0	0	1	1	1	1	1	1	0	0
Prognosis and oncogenomic profiling of patients with tropomyosin receptor kinase fusion cancer in the 100,000 genomes project	Bridgewater, 2022	From March 2016 to July 2019	United Kingdom	Retrospective cohort	Not mentioned	Not mentioned	Not mentioned	whole genome sequencing	Not mentioned	Not mentioned	1174	Not mentioned	7	1	2	4	Not mentioned	Not mentioned	Not mentioned	not mentioned	Not mentioned	Not mentioned	Not mentioned	Not mentioned		1	1	0	1	1	0	1	1	1	1	1	1	0	0	0	0	0	1	1	1	1	0	1	1
An NTRK-1-associated soft tissue tumor showing distinctive nodules with peripheral accentuation of cellularity	Czaja, 2022	Not mentioned	United States of America	Case report	Pediatrics	11 years	0/1 (0%)	NGS, IHC	spindle cell neoplasm in the dermis and subcutis with multiple large cellular nodules with peripheral accentuation of cellularity, reminiscent of those described in epithelioid Malignant peripheral nerve sheath tumor	back (1)	1	1 with lipofibromatosis-like neural tumor	1	1	0	0	LMNA-NTRK1 (1)	0	0	excisional biopsy	1/1 responded to therapy	no outcomes	0	9 months		1	1	0	1	1	1	1	1	1	1	1	1	0	0	0	0	1	1	1	1	1	1	1	1
EML4-NTRK3 Fusion Cervical Sarcoma: A Case Report and Literature Review	Dang, 2022	Not mentioned	China	Case report	Adults	33 years	1/1 (100%)	NGS, IHC	macroscopic feature of the tumor: the tumor tissue was composed of diffused spindle cells with fascicular, nested, or uniform patterns, and vascularization and nuclear atypia (low to moderate) were observable	uterine cervix (1)	1	1 with NTRK fusion cervical sarcoma	1	0	0	1	0	0	EML4-NTRK3 (1)	laparoscopic hysterectomy, bilateral salpingo-oophorectomy, pelvic lymph node dissection, and partial vaginal resection (1)	0/1 responded to therapy	metastesis & death (1)	1 patient	1 month		1	1	0	1	1	1	1	1	1	1	1	1	0	0	0	0	1	1	1	1	1	1	1	1
Updated Integrated Analysis of the Efficacy and Safety of Entrectinib in Patients With NTRK Fusion-Positive Solid Tumors	Demetri, 2022	From 2014 to 2020	United States and South Korea	Integreated analysis of RCTs	Adults	Not mentioned	Not mentioned	NGS, IHC, FISH, quantative PCR, , Sanger sequencing, reverse transcription-PCR, or NanoString	Not mentioned	Not mentioned	26	10 with unclassified sarcoma, 5 with spindle cell sarcomas, 2 with GIST, 2 with leiomyosarcoma, 1 with angiosarcoma, 1 with cervical adenosarcoma, 1 with chondrosarcoma, 1 with endometrial sarcoma, 1 with endometrial stromal sarcoma, 1 with Follicular dendritic cell sarcoma, 1 with MPNST	26	Not mentioned	Not mentioned	Not mentioned	Not mentioned	Not mentioned	Not mentioned	Entrectinib	15/26 (57.7%)	Progression free survival median of 10 months, and overall survival median of 18.7 months	Not mentioned	6 years	we were unable to retrieve the original trials
Real-world survival outcomes in patients with locally advanced or metastatic NTRK fusion-positive solid tumors receiving standard-of-care therapies other than targeted TRK inhibitors	Hibar, 2022	January 1, 2011 to December 31, 2019	United States of America	Retrospective descriptive	Adults	Not mentioned	Not mentioned	NGS	Not mentioned	Not mentioned	287	Not mentioned	6	Not mentioned	Not mentioned	Not mentioned	Not mentioned	Not mentioned	Not mentioned	Not mentioned	Not mentioned	Not mentioned	Not mentioned	Not mentioned		1	1	1	1	1	1	1	1	1	1	1	1	0	0	0	0	0	1	1	1	1	0	0	0
A novel ETV6-NTRK3 gene fusion in primary renal fibrosarcoma	Jiang, 2022	Not mentioned	China	Case report	Adults	66 years	0/1 (0%)	RT-PCR, FISH, DNA Sequencing	Not mentioned	kidney (1)	1	1 with primary renal fibrosarcoma	1	0	0	1	0	0	ETV6–NTRK3 (1)	retroperitoneal laparoscopic right nephrectomy	Not mentioned	Not mentioned	Not mentioned	Not mentioned		1	1	1	1	1	1	1	1	1	1	1	1	0	0	0	0	1	1	1	1	1	1	0	1
NTRK-rearranged spindle cell neoplasm of the lower extremity: radiologic-pathologic correlation	Overfield, 2022	Not mentioned	United States of America	Case report	Adults	20 years	0/1 (0%)	Not mentioned	long spindle cells with scant cytoplasm and cytologically bland nuclei. Mitotic fgures were scarce . Distinctive features included prominent vascularity with notable stromal and perivascular hyaline fbrosis with patchy lymphoplasmacytic infltrates.	knee (1)	1	1 with NTRK‑rearranged spindle cell tumor	1	1	0	0	TPM3-NTRK1 (1)	0	0	surgical resection	Not mentioned	Not mentioned	Not mentioned	6 months		1	1	1	1	1	1	1	1	1	1	1	0	0	0	0	0	1	1	1	1	1	1	0	1
Case Report: Adult NTRK-Rearranged Spindle Cell Neoplasm: Early Tumor Shrinkage in a Case With Bone and Visceral Metastases Treated With Targeted Therapy	Recine, 2022	From 2007 to 2021	Italy	Case report	Adults	26 years	0/1 (0%)	IHC, NGS	low grade spindle cells characterized showing a mitotic rate of <5/10 HPFs and low-to-moderate cellularity with focal vascular invasion. Spindle cells arranged in a fascicules	abdominal cutaneous lesion (1)	1	1 with NTRK-rearranged spindle cell neoplasm	1	1	0	0	TPM4-NTRK1 (1)	0	0	surgical resection, chemothrapy, radiotherapy, TRK inhibitor (larotrectinib)	Not mentioned	Metastasis (1)	0 patients	14 years		1	1	1	1	1	1	1	1	1	1	1	1	0	0	0	0	1	1	1	1	1	1	0	1
Prevalence of NTRK Fusions in Canadian Solid Tumour Cancer Patients	Silvertown, 2022	From 2019 to 2021	Canada	Retrospective descriptive	Both	Not mentioned	Not mentioned	IHC, NGS	Not mentioned	chest (2), arm (1), not specifed (162)	165	1 with spindle cell soft tissue sarcoma, 2 with MPNST, 162 with sarcoma type not mentioned	3	1	0	2	TPM3-NTRK1 (1)	0	SQSTM1-NTRK3 (1), SPECC1L–NTRK3 (1)	not mentioned	Not mentioned	Not mentioned	Not mentioned	Not mentioned		1	1	1	1	1	1	0	1	0	0	1	1	0	0	0	0	0	1	1	1	1	0	0	0
Dramatic response to entrectinib in a patient with malignant peripheral nerve sheath tumor harboring novel <i>SNRNP70-NTRK3</i> fusion gene	Kobayashi, 2022	Not mentioned	Japan	Case report	Adults	51 years	Not mentioned	RNA panel testing, DNA panel testing, IHC, FISH	Atypical spindle to epithelioid cells with large nucleoli and frequent mitotic figures and areas of necrosis	buttock (1)	1	1 with malignant peripheral nerve sheath tumor	1	0	0	1	0	0	SNRNP70-NTRK3 (1)	surgical resection, radiotherapy, chemotherapy, TRK inhibitor (entrectinib)	Not mentioned	Metastasis (1)	Not mentioned	11 months		1	1	1	1	1	1	1	1	1	1	1	1	0	0	0	0	1	1	1	1	1	1	1	1
Myxoid spindle cell sarcoma with ETV6-NTRK3 fusion	Kyriazogloua, 2022	From 2020	Greece	Case report	Adults	38 years	1/1 (100%)	NGS, RT-PCR	The tumor cells were diffusely arranged in myxoid stroma and demonstrated high mitotic activity and moderate atypia. Presence of prominent vasculature including thin, curvilinear vessels.	left gluteal area (1)	1	1 with unclassified myxoid spindle cell sarcoma	1	0	0	1	0	0	ETV6–NTRK3 (1)	chemotherapy, radiotherapym surgical resection	1/1 responded to therapy	Not mentioned	0 patients	Not mentioned		1	1	1	1	1	1	1	1	1	1	1	1	0	0	0	0	1	1	1	1	1	1	1	1
NTRK-Fusion Sarcoma of the Uterine Cervix: Report of 2 Cases With Comparative Clinicopathologic Features	Nilforoushan, 2022	Not mentioned	United States of America	Case series	Adults	53 (±1) years	2/2 (100%)	DNA and RNA sequencing	one case with Spindle cell proliferation arranged in disordered fascicles, one case with exophytic spindle cell tumor with focal infiltrating pattern	cervix (2)	2	2 with Spindle cell sarcoma	2	1	0	1	TPM3-NTRK1 (1)	0	SPECC1L-NTRK3 (1)	Surgery, Radiation, NTRK inhibitor (larotrectinib)	1/2 patients have no evidence of disease	Not mentioned	1 patient	8 months and 6 months		1	1	0	1	1	1	1	1	1	1	1	1	0	0	0	0	1	1	1	1	1	0	0	0
NTRK Fusions Detection in Paediatric Sarcomas to Expand the Morphological Spectrum and Clinical Relevance of Selected Entities	Nozzoli, 2022	From 2000 to 2020	Italy	Retrospective descriptive	Pediatrics	Not mentioned	47/105 (44.7%)	IHC, NGS, RT-PCR	Small round cell morphology, polymorphic small round and spindle cell phenotype, weak CD99 immunoexpression	soft tissue(23), and bone (82)	105	96 with Ewing sarcoma, 3 with EWSR1-non-ETS round cell sarcoma, 1 with Sarcoma with BCOR genetic alteration, 5 with undifferentiated soft tissue sarcomas	2	0	0	2	0	0	ETV6–NTRK3 (2)	Neoadjuvant chemotherapy (ISG/SSG III protocol), Surgery, Maintenance chemotherapy (VAdmC regimen), Adjuvant multiagent chemotherapy (VAC/IE protocol)	2/2 patients have no evidence of disease	Not mentioned	0 patients	4 years and 6 years		1	1	0	1	1	1	1	1	1	1	1	1	0	0	0	0	1	1	1	1	1	0	0	0
Intestinal LMNA::NTRK1-fused spindle cell neoplasm with S100 and CD34 coexpression: a new case	Rahim, 2022	Not mentioned	Kuwait	Case report	Adults	20 years	1/1 (100%)	DNA-based NGS, RNA-based gene fusion assay, pan-TRK IHC	Monomorphic spindle cell proliferation with haphazard growth, CD34+ and S100+ coexpression, distinctive stromal and perivascular hyalinisation	ileum (1)	1	1 with spindle cell sarcoma	1	1	0	0	LMNA-NTRK1 (1)	0	0	surgery (1/1)	1/1 responded to therapy	Not mentioned	0 patients	3 months		1	1	0	1	1	1	1	1	1	1	1	1	0	0	0	0	1	1	1	1	1	1	0	0
NTRK Fusions in a Sarcomas Series: Pathology, Molecular and Clinical Aspects	Siozopoulou, 2022	Not mentioned	Belgium	Retrospective descriptive	Both	15 (±5) years	24/70 (34.3%)	NGS	Polypoid dermal spindle cell proliferation and tumors displayed a fascicular growth pattern (1). Spindle cell proliferation. Between the tumor cells are thick collagen fibers (red arrow), as well as areas with calcification and ossification (1)	Bone (19), Deep soft tissue extremities (17), Deep soft tissue trunk and back (5), Deep soft tissue head and neck (4), Skin and subcutaneous fat tissue (12), Abdomen (6), Mediastinum (5), Retroperitoneum (2)	70	10 with chondrosarcoma, 3 with Ewing sarcoma, 5 with osteosarcoma, 7 with angiosarcoma, 8 with Kaposi sarcoma, 5 with leiomyosarcoma, 9 with liposarcoma, 5 with myxofibrosarcoma, 3 with rhabdomyosarcoma, 3 with synovial sarcoma, and 12 with sarcoma not otherwise specified	2	0	0	2	0	0	ETV6-NTRK3 (1), TFG-NTRK3 (1)	surgery only (28), surgery with adjuvant therapy (28), chemotherapy (12), larotrectinib and entrectinib (2)	Not mentioned	Not mentioned	1 patient	Not mentioned		1	1	0	1	1	1	1	1	1	1	1	1	0	0	0	0	1	1	1	1	1	0	0	0
The patential long-term comparative effectiveness of larotrectinib vs standard of care for treatment of metastatic TRK fusion thyroid cancer, colorectal cancer, and soft tissue sarcoma	Suh, 2022	From 2020	United States of America	Partitioned Survival Model study	Both	41 (±5.5) years	136/250 (54.4%)	Not mentioned	Not mentioned	Not mentioned	250	32 with Liposarcoma, 59 with leiomyosarcoma, 27 with Synovial sarcoma, 132 with soft tissue sarcoma not specified.	not mentioned	Not mentioned	Not mentioned	Not mentioned	Not mentioned	Not mentioned	Not mentioned	Larotrectinib only (23), Doxorubicin + ifosfamide (227)	60/227 responded to Doxorubicin + Ifosfamide, 12/23 responded to Larotrecinib	Not mentioned	Not mentioned	30 years		1	1	1	1	1	1	1	1	1	1	1	1	0	0	0	0	1	1	1	1	1	0	0	0
Genomic Evolution and Personalized Therapy of an Infantile Fibrosarcoma Harboring an NTRK Oncogenic Fusion	Thorwarth, 2022	Not mentioned	Germany	Case report	Pediatrics	13 months	Not mentioned	Single-nucleotide variant analysis, whole-exome sequencing	Not mentioned	intrathoracic (1)	1	1 with Infantile fibrosarcomas	1	0	0	1	0	0	ETV6-NTRK3 (1)	Neoadjuvant polychemotherapy (N4 according to NB2016 Registry and vincristine, actinomycin D, cyclophosphamide [VAC] according to CWS), larotrectinib, selitrectinib, trametinib	Progressive disease after neoadjuvant polychemotherapy, partial response to larotrectinib, disease progression after total larotrectinib treatment duration of 4 months, partial response to selitrectinib, disease progression after 3 months of selitrectinib, partial response to CWS I2 VAd regimen	Recurrent respiratory symptoms	1 patient	Not mentioned		1	1	1	1	1	1	1	1	1	1	1	1	0	0	0	0	1	1	1	1	1	1	0	0
Adult NTRK-rearranged spindle cell neoplasms of the viscera: with an emphasis on rare locations and heterologous elements	Tsai, 2022	From 2018 to 2020	Taiwan	Retrospective and prospective cohort	Both	Not mentioned	Not mentioned	RNA sequencing, FISH, RT-PCR, IHC	2 cases were Spindle fibroblastic sarcoma, low-to-intermediate grade, 1 case was MPNST-like fibrosarcoma with heterologous RMS histology, high grade, 1 case was Prostatic stromal sarcoma featuring phyllodes-like architecture with herringbone overgrowth, low-to-intermediate grade, 1 case was Fibrosarcoma, high-grade, with focal adenosarcoma-like fronds and myxoid stroma, 1 case was Fibrosarcoma wi…	Right lung (1), heart (1), right pleura (1), prostate (1), uterine cervix (2), not mentioned (1)	7	7 with spindle cell neoplasm	7	5	0	1 fuison, 1 ntrk3 rearrangment	TPM3-NTRK1(4), LMNA-NTRK1(1)	0	SQSTM1-NTRK3(1), NTRK3 rearrangement (1)	not mentioned	Not mentioned	metastasis (2)	3 patients	5 to 40 months		1	1	1	1	1	1	1	1	1	1	1	1	0	0	0	0	0	1	1	1	1	0	0	0
The Use of Pan-Tropomyosin Receptor Kinase Immunohistochemistry as a Screening Tool for the Detection of Neurotrophic Tropomyosin-Related Kinase Fusions: Real-World Data from a National Multicentric Retrospective Study	Van Bockstal, 2022	From 2019 to 2020	Belgium	Retrospective descriptive	Adults	Not mentioned	Not mentioned	Pan-TRK IHC and subsequent molecular NTRK testing, FISH, RNA sequencing	Not mentioned	Not mentioned	6	3 with Infantile fibrosarcoma, 2 with spindle cell sarcoma, 1 with lipofibromatosis-like neural tumour	5	1	0	4	TPM3-NTRK1(1)	0	ETV6-NTRK3 (2), TFG-NTRK3 (1), SPECC1L-NTRK3 (1)	not mentioned	Not mentioned	Not mentioned	not mentioned	Not mentioned		1	1	0	1	1	1	1	1	1	1	1	1	0	0	0	0	0	0	1	1	1	0	0	0
Primary NTRK-rearranged spindle cell neoplasm of bone harboring an HMBOX1::NTRK3 gene fusion	Wang, 2022	Not mentioned	China	Case report	Adults	21 years	1/1 (100%)	FISH, RNA-sequencing, NGS	haphazard fascicles of monomorphic spindle cells with mild nuclear atypia, rare mitotic activity, focal myxoid change, scattered hyperchromatic multinucleated cells	femur (1)	1	1 with spindle cell sarcoma	1	0	0	1	0	0	HMBOX1-NTRK3 (1)	Curettage and bone grafting	Not mentioned	Not mentioned	not mentioned	7 months after surgery.		1	1	1	1	1	1	1	1	1	1	1	1	0	0	0	0	1	1	1	1	1	1	0	0
NTRK-fusion associated sarcoma: Identification of two cases with a distinct perineurioma-like pattern	Young, 2022	From 2014 to 2021	Not mentioned	Case series	Adults	66.5 (±0.5) years	1/2 (50%)	Pan-TRK IHC, FISH	Spindle cells forming loose fascicles within a fibrous stroma, perineurioma-like storiform, whorling pattern; lobules of plump spindle cells demonstrating focal whorling, storiform, and loose fascicular arrangements suggestive of perineurial differentiation	Peri-adrenal (1); Retroperitoneal (1)	2	Not mentioned	2 with NTRK gene rearrangment	2	0	0	NTRK1 rearrangement (2)	0	0	TRK inhibitor therapy (larotrectinib) initiated after tumor recurrence but showed a further increase in size. Treated with radiotherapy and pazopanib (another TRK inhibitor), which stabilized the disease for a while(1), surgery(1)	Not mentioned	Patient is stable in palliative care	0 patients	Not mentioned		1	1	1	1	1	1	1	1	1	1	1	1	0	0	0	0	0	0	1	1	1	0	0	0
Abstract 2184: Landscape of genomic alterations of ultra-rare sarcomas (URS) from 1,079 patients in the AACR GENIE real world database: Clinical implications	Moyers, 2022	Not mentioned	Not mentioned	Retrospective cohort	Not mentioned	Not mentioned	Not mentioned	Genomic sequencing	Not mentioned	Not mentioned	4256	3,424 with soft tissue sarcomas, 832 with bone sarcomas	36	Not mentioned	Not mentioned	Not mentioned	Not mentioned	Not mentioned	Not mentioned	Not mentioned	Not mentioned	Not mentioned	Not mentioned	Not mentioned	data extracted from asbtract
A rare case of spindle cell neoplasm with NTRK-fusion in central nervous system	Gong, 2023	Not mentioned	China	Case report	Pediatrics	13 years	0/1 (0%)	NGS, FISH, IHC	spindle cells	brain (1)	1	1 with spindle cell neoplasm	1	1	0	0	TPM3-NTRK1 (1)	0	0	Surgical excision (1)	1/1 responded to therapy	Not mentioned	Not mentioned	Not mentioned		1	1	0	1	1	1	1	1	1	1	1	1	0	0	0	0	1	1	1	1	1	1	1	1
72P Molecular characterization of advanced primary cardiac sarcomas	Agostara, 2023	From May 2021 to November 2022	Italy	Case series	Both	Not mentioned	Not mentioned	NGS	Not mentioned	cardiac (4)	4	4 with primary cardiac sarcoma	1	0	0	1	0	0	NTRK3-unspecified fusion partner (1)	doxorubicin-based chemotherapy	2/4 partial response and 2/4 stable diseases	Not mentioned	0	Not mentioned		1	1	0	1	1	1	1	1	1	1	1	1	0	0	0	0	1	1	1	1	1	0	0	0
Identification of NTRK fusion genes. Experience in Mexico	Bornstein-Quevedo, 2023	From July 2019 to March 2021	Mexico	Retrospective and cross-sectional basket trial	both	Not mentioned	48/99 (48.5%)	NGS, IHC	Not mentioned	Not mentioned	99	2 with soft-tissue sarcoma, 1 with infantile fibrosarcoma, 96 not mentioned	3	2	0	1	LMNA-NTRK1 (2)	0	ETV6-NTRK3 (1)	not mentioned	Not mentioned	Not mentioned	Not mentioned	Not mentioned		1	1	1	1	1	1	1	1	1	1	1	1	0	0	0	0	0	1	1	1	1	0	0	0
PRAME immunohistochemistry in soft tissue tumors and mimics: a study of 350 cases highlighting its imperfect specificity but potentially useful diagnostic applications	Cammareri, 2023	Not mentioned	France	Case series	Not mentioned	Not mentioned	Not mentioned	RNA sequencing, NGS, FISH	Not mentioned	Not mentioned	330	31 with adipocytic tumors, 45 with fibroblastic and myofibroblastic tumors, 44 with vascular tumors and malformations, 15 with smooth muscle tumors, 16 with skeletal muscle tumors, 36 with peripheral nerve sheath tumors, 23 with undifferentiated small round cell sarcomas of bone and soft tissue, 12 with mesenchymal tumors of the digestive system, 74 with tumors of uncertain differentiation, 19 wi…	4	3	1	0	TMP3-NTRK1 (3)	STRN3-NTRK2 (1)	0	not mentioned	Not mentioned	Not mentioned	Not mentioned	Not mentioned		1	0	0	1	1	1	1	1	1	1	1	1	0	0	0	0	0	1	1	1	1	0	0	0
NTRK-rearranged mesenchymal tumour in oesophagus with DOG1 immunohistochemical expression: is it a gastrointestinal stromal tumour?	Challa, 2023	Not mentioned	United States of America	Case report	Adults	34 years	1/1 (100%)	NGS	low-grade spindle cells and a background of myxoid stroma and epithelioid cells with cytoplasmic vacuolisation.	esophagus (1)	1	1 with mesenchymal neoplasm	1	0	0	1	0	0	ETV6-NTRK3 (1)	active surviellance	1/1 responded to therapy	Not mentioned	0	28 months		1	1	1	1	1	1	1	1	1	1	1	1	0	0	0	0	1	0	1	1	1	1	1	0
Therapeutic strategies and clinical evolution of patients with infantile fibrosarcoma: a unique paediatric case series	Corral Sánchez, 2023	From 2009 to 2022	Spain	Case series	Pediatrics	Not mentioned	4/8 (50%)	RT-PCR, FISH	Not mentioned	trunk (4), lower limbs (2), neck (1), upper limbs (1)	8	8 with infantile fibrosarcoma	4	0	0	4	0	0	ETV6–NTRK3 (4)	surgery (3), larotrectinib only no surgery (3), surgery and chemotherapy (1)	3/4 responded to therapy 1/4 did not receive therapy	One patient died but he did not recieve any treatment.	0	median 4.4 years		1	1	0	1	1	1	0	1	0	1	1	1	0	0	0	0	1	1	1	1	1	0	0	0
Expanding a precision medicine platform for malignant peripheral nerve sheath tumors: New patient-derived orthotopic xenografts, cell lines and tumor entities	Creus‐Bachiller, 2023	From January 2011 to March 2016	Spain	Case series	Adults	52 (±21.4) years	3/5 (60%)	RNA sequencing, whole-genome sequencing	Not mentioned	back (3), thigh (1), wrist (1)	5	3 with malignant peripheral nerve sheath tumor, 1 with NTRK-associated spindle cell sarcoma, 1 unclassifiable tumor	1	1	0	0	LMNA-NTRK1 (1)	0	0	not mentioned	Not mentioned	Not mentioned	Not mentioned	Not mentioned		1	0	0	1	1	1	1	1	1	0	1	1	0	0	0	0	0	1	1	0	1	0	0	0
Natural history and treatment efficacy in an ambispective case series of <em>NTRK</em>-rearranged mesenchymal tumors	Dufresne, 2023	From March 2019 to March 2021	France	Retrospective and prospective cohort	Both	47.6 years	7/16 (43.8%)	whole-exome RNA-sequencing	Not mentioned	Back (4), upper limbs (2), lower limbs (2), abdomen (2), pulmonary artery (1), mediastinal (1), spermatic cord (1), uterine (1)	16	2 with lipofibromatosis-like neural tumor, 1 with peripheral nerve sheath tumor, 1 with cutaneous spindle cell mesenchymal tumor, 3 with inflammatory myofibroblastic tumor, 1 with gastrointestinal stromal tumor, 2 with dedifferentiated liposarcomas, 2 with undifferentiated pleomorphic sarcoma, 1 with leiomyosarcoma,1 with intimal sarcoma, 1 with high-grade uterine sarcoma, 1 with neurofibromatosi…	16	8	0	8	TPM3-NTRK1(2), TPR-NTRK1 (1), TSNAX-NTRK1 (1), LMNA-NTRK1 (1), CCDC171-NTRK1 (1), VAMP4-NTRK1 (1), GON4L-NTRK1 (1)	0	RAB14-NTRK3 (1), FANCI-NTRK3 (1), MCTP2-NTRK3 (1), RBPMS-NTRK3 (1), ETV6-NTRK3 (3), TFG-NTRK3 (1)	surgery (7/16), systemic chemotherapy (5/16), Entrectinib (2), larotrectinib (2), cabozantinib (1)	complete response (7/16), died of disease (4/16), alive with disease (3/16)	Metastatic recurrence (8/16)	2 patients	1 month- 4.5 years		1	0	0	1	1	1	1	1	1	1	1	1	0	0	0	0	0	1	1	1	1	0	0	0
Progressive metastatic infantile fibrosarcoma with multiple acquired mutations	Furtado, 2023	Not mentioned	United States of America	Case report	Pediatrics	5 months	0/1 (0%)	RT-PCR, FISH, Whole-genome sequencing, whole-exome sequencing, and transcriptome (RNA) sequencing	well-vascularized malignant fibroblastic neoplasm composed of a monomorphic population of spindled cells with eosinophilic cytoplasm and round-to-elongated nuclei	buttock (1)	1	1 with infantile fibrosarcoma	1	0	0	1	0	0	ETV6–NTRK3 (1)	surgery, chemotherapy, larotrectinib, radiotherapy, repotrectinib (1)	Not mentioned	Metastesis (1)	1 patient	Not mentioned		1	1	0	1	1	1	1	1	1	1	1	1	0	0	0	0	1	1	1	1	1	1	1	1
NTRK rearranged sarcoma of the bone. Role for larotrectinib in the neoadjuvant setting of an ultra-rare tumor: a case report	Palmerini, 2023	Not mentioned	Italy	Case report	Adults	33 years	0/1 (0%)	NGS	Spindle cell proliferation with nuclear atypia staining and mytotic figures, in a storiform pattern.	heel of right foot (1)	1	1 with undifferentiated spindle cell sarcoma	1	0	0	1	0	0	EML4–NTRK3 (1)	surgical resection, chemotherapy, TRK inhibitor (larotrectinib)	1/1 responded to therapy	Metastasis (1)	0 patients	14 months		1	1	1	1	1	1	1	1	1	1	1	1	0	0	0	0	1	1	1	1	1	1	0	1
NTRK-rearranged spindle cell neoplasms: a clinicopathological and molecular study of 13 cases with peculiar characteristics at one of the largest institutions in China	Yin, 2023	Not mentioned	China	Retrospective cohort	Both	Not mentioned	6/13 (46.2%)	IHC, NGS, Sanger sequencing and PCR, FISH	LPF-NT-like tumours were characterised by low cell density and monomorphic spindle cells with haphazardly arranged tapering nuclei. Showing Stromal collagen bands, lymphocytic infiltrates, and perivascular hyaline degeneration. MPNST/fibrosarcoma tumors presented with an increased cellularity, had spindle cells with large hyperchromatic nuclei and eosinophilic cytoplasm, arranged in fascicular or…	Back (1), Abdominal wall (1), upper limb (4) lower limb (2), buttock (2), Small intestine (1), Rectum (2)	13	4 with lipofibromatosis-like neural tumour, 8 with malignant peripheral nerve sheath tumours-like, and 1 with myxofibrosarcoma-like.	12	12	0	0	LMNA-NTRK1 (5), CPSF6-NTRK1 (1), TPM3-NTRK1 (3), GAS2L1-NTRK1 (1), IGR-NTRK1 (1), SQSTM1-NTRK1 (1)	0	0	surgical resection (13/13)	6/13 responded to therapy	Metastasis (2)	4 patients	6-60 months		1	1	1	1	1	1	1	1	1	1	1	1	0	0	0	0	1	1	1	1	1	0	0	0
Imaging findings of NTRK-rearranged spindle cell neoplasms: A case series	Kobayashi, 2023	From January 2003 to December 2019	Japan	Case series	Both	22 (±13.7) years	3/6 (50%)	NGS	Invasion of the surrounding tissues was observed in all patients, especially in fat tissue. Invasion into the surrounding tissues from the main nodule. Mitotic figures equal to or greater than 10 were observed in two patients, whilst others had fewer mitotic figures. High cellularity was observed in four patients.	lower limb (4), buttock (1), perineal (1)	6	1 with NTRK-rearranged spindle cell neoplasm, 1 with sarcoma intermediate malignancy, 3 with solitary fibrous tumor, and 1 with dedifferentiated liposarcoma.	6	4	0	2	LMNA-NTRK1 (2), TPM3-NTRK1 (1), TPR-NTRK1 (1)	0	YWHAE‑NTRK3 (1), PPFIBP‑NTRK3 (1)	surgery only (5/6), surgery & chemotherapy (1/6)	5/6 responded to therapy	Metastasis & death (1)	1 patient	16 to146 months		1	1	0	1	1	1	1	0	1	1	1	1	0	0	0	0	1	1	1	1	1	0	0	0
Frequent CD30 Expression in an Emerging Group of Mesenchymal Tumors With NTRK, BRAF, RAF1, or RET Fusions	Kojima, 2023	Not mentioned	Japan	Retrospective descriptive	Both	Not mentioned	Not mentioned	NGS, FISH, IHC	All the cases showed spindle cell proliferation with variable atypia, exhibiting 1 or more of the following features: fascicular proliferation of spindle cells, lipofibromatosis-like mixture with adipose tissues, relatively uniform cytology with or without scattered pleomorphic cells, perivascular ring-like hyalinization, hemangiopericytomatous vessels. The spindled tumor cells occasionally exhib…	Head & neck (6) Upper limb (4) Lower limb (15) Intradural (1) Pelvic iliac bone (1) Chest (3) Breast (1) Kidney (1) Jejunum (1) Retroperitoneum (3) Not mentioned (167)	203	38 with mesenchymal tumors, 15 with IMT, 20 with undifferentiated pleomorphic sarcomas, 20 with myxofibrosarcomas, 20 with malignant peripheral nerve sheath tumors, 20 with dermatofibrosarcoma protuberans, 10 with dedifferentiated liposarcomas, 10 with solitary fibrous tumors, 10 with synovial sarcomas, 10 with leiomyosarcomas, 10 with BCOR-associated sarcomas, 10 with GISTs, 5 with spindle cell/…	22	13	2	7	LMNA-NTRK1 (6), TPM3-NTRK1 (3), NTRK1-unknown fusion partner (4)	KANK1-NTRK2 (1), NTRK2-unknown fusion partner (1)	ETV6-NTRK3 (1), EIF2S2-NTRK3 (1), STRN3-NTRK3 (1), STRN-NTRK3 (1), RPS17-NTRK3 (1), NTRK3-unknown fusion partner (2)	not mentioned	Not mentioned	Not mentioned	Not mentioned	Not mentioned		1	1	1	1	1	1	1	1	1	1	1	1	0	0	0	0	1	1	1	1	1	1	1	1
60P Spindle cell sarcomas with tyrosine kinase rearrangement	Krsková, 2023	Not mentioned	Czech Republic	Case series	Not mentioned	Not mentioned	Not mentioned	PCR, Genome-wide DNA methylation profiling	Not mentioned	Not mentioned	11	6 with spindle cell sarcoma with rearrangement/SNV in BRAF gene, 3 with pediatric spindle cell sarcomas with NTRK1 fusion, 1 with high-grade sarcoma with ALK fusion and 1 with pediatric sarcoma with tyrosine-kinase duplication of EGFR gene	3	3	0	0	NTRK1-unspecified fusion partner (3)	0	0	not mentioned	Not mentioned	Not mentioned	Not mentioned	Not mentioned	data extracted from asbtract
Sequential treatments with TRK inhibitors in a patient with NTRK fusion-positive sarcoma: A case report	Kubota, 2023	Not mentioned	Japan	Case report	Adults	48 years	1/1 (100%)	NGS	small round cell tumor exhibiting naked nuclei with short spindle-, oval-, or diamond- shaped nuclei	mediastinum (1)	1	1 with Ewing sarcoma	1	1	0	0	PHF20-NTRK1 (1)	0	0	chemotherapy, radiotherapy, TRK inhibitor (entrectinib, larotrectinib)	Not mentioned	Radiation pneumonitis (1)	1 patients	21 months		1	1	1	1	1	1	0	0	1	1	1	1	0	0	0	0	1	1	1	1	1	1	0	0
Larotrectinib efficacy and safety in adult patients with tropomyosin receptor kinase fusion sarcomas	Kummar, 2023	until July 20, 2021	United States of America	pooled analysis of three clinical trials	Adults	Not mentioned	17/36 (47.2%)	DNA and RNA based NGS, FISH	Not mentioned	Not mentioned	36	1 with chondrosarcoma, 1 with bone sarcoma not specified otherwise, 4 with Gastrointestinal stromal tumors, 8 with soft tissue tumors not specified otherwise, 6 with Malignant peripheral nerve sheath tumor, 4 with Spindle cell sarcoma, 3 with Epithelioid spindle sarcoma, 2 with Inflammatory myofibroblastic tumor, 2 with Myopericytoma, 2 with Stromal tumor, 1 with Dedifferentiated liposarcoma, 1 w…	36	19	1	16	LMNA-NTRK1 (9), NTRK1- fusion partner was not specified (10)	NTRK2- fusion partner was not specified (1)	ETV6-NTRK3 (8), NTRK3- fusion partner was not specified (8)	surgical resection, systemic therapy, radiotherapy and then all patients were included in trials for larotrectinib. 35/36 patients received 100mg larotrectinb, 1/36 patient received 150mg of larotrectinb	7/36 had complete response, 14/36 had partial response	Stable disease 12/36, Progressive disease: 2/36	Not mentioned	up to 54 months		1	1	1	1	1	1	0	1	1	1	1	1	0	0	0	0	1	1	1	1	1	1	0	0
Identification of dual STRN-NTRK2 rearrangements in a high grade sarcoma, with good clinical response to first-line larotrectinib therapy	Lin, 2023	Not mentioned	United States of America	Case report	Adults	35 years	1/1 (100%)	RNA-based NGS, gene fusion panel analysis	reminiscent of a malignant solitary fibrous tumor, high-grade undifferentiated sarcoma with treatment effects	right gluteal area (1)	1	1 with malignant solitary fibrous tumor	1	0	1	0	0	STRN-NTRK2 (1)	0	hemipelvectomy & Larotrectinib, at 100 mg, BID,	1/1 responded to therapy	Metastasis (1)	1 patient	2.6 years		1	1	0	1	1	1	1	1	1	1	1	1	0	0	0	0	1	1	1	1	1	1	0	0
Cost-Efficient Detection of NTRK1/2/3 Gene Fusions: Single-Center Analysis of 8075 Tumor Samples	Romanko, 2023	From 2019 to 2022	Not mentioned	Retrospective descriptive	Both	Not mentioned	Not mentioned	50/30-end unbalanced expression test followed by variant-specific PCR, NGS	Not mentioned	Not mentioned	226	44 with inflammatory myofibroblastic tumor, 1 with congenital mesoblastic nephroma, 56 with sarcoma not otherwise specified, 18 with Ewing sarcoma, 19 with leiomyosarcoma, 14 with liposarcoma, 1 with spindle cell rhabdomyosarcoma, 8 with chondroblastic osteosarcoma, 2 with clear cell sarcoma, 11 with malignant peripheral nerve sheath tumor, 7 with alveolar rhabdomyosarcoma, 3 with infantile fibro…	13	4	0	5	TPR-NTRK1 (1), TPM3-NTRK1 (2), MEF2D-NTRK1 (1)	0	ETV6-NTRK3 (5)	not mentioned	Not mentioned	Not mentioned	Not mentioned	Not mentioned		1	1	0	1	1	1	1	1	1	1	1	1	0	0	0	0	0	1	1	1	1	0	0	0
Limb salvage of an infant with infantile fibrosarcoma using TRK inhibitor larotrectinib	Sahni, 2023	Not mentioned	Bangladesh, India	Case report	Pediatrics	8 months	0/1 (0%)	FISH, NGS	Spindle-shaped cells, occasional sheets of immature polygonal or round cells, frequent mitoses	leg (1)	1	1 with infantile fibrosarcoma	1	0	0	1	0	0	ETV6-NTRK3 (1)	Larotrectinib	1/1 responded to therapy	Not mentioned	Not mentioned	Not mentioned		1	1	0	1	1	1	1	1	1	1	1	1	0	0	0	0	1	1	1	1	1	1	0	0
Kinase fusion positive intra-osseous spindle cell tumors: A series of eight cases with review of the literature	Suurmeijer, 2023	Not mentioned	Netherlands, United States of America	Retrospective descriptive	Both	20.54 (±22.7) years	2/4 (50%)	FISH, targeted RNA sequencing, Pan-TRK IHC	the MPNST-like tumor had a solid growth and showed features resembling MPNST, composed of primtive uniform blue ovoid to spindle cells with scant cytoplasm arranged haphazardly or in a vague fascicular or angiopericytic pattern. MPNST-like tumors were positive for S100. CD34 immunopositivity. high-grade MPNST showed mitotically active monotonous blue spindle cells invading bone and arranged in a …	Head and neck (1), tibia (1), pelvis (1), chest wall (1).	4	1 with malignant peripheral nerve sheath tumor-like, 1 with adult fibrosarcoma-like, 1 with malignant peripheral nerve sheath tumor, 1 with infantile fibrosarcoma-like tumor.	2	1	0	1	TPM3-NTRK1 (1)	0	UPF2-NTRK3 (1)	Not mentioned	Not mentioned	Not mentioned	Not mentioned	Not mentioned		1	1	0	1	1	1	1	1	1	1	1	1	0	0	0	0	0	1	1	1	1	0	0	0
Head and Neck Mesenchymal Tumors with Kinase Fusions: A Report of 15 Cases With Emphasis on Wide Anatomic Distribution and Diverse Histologic Appearance	Xu, 2023	Not mentioned	United States of America	Case series	Both	not mentioned	7/13 (53.8%)	FISH, targeted RNA sequencing	Not mentioned	head and neck region (13).	13	4 with infantile fibrosarcoma, 2 with lipofibromatosis-like neural tumor, 3 with malignant peripheral nerve sheath tumor-like, 2 with adult-type fibrosarcoma-like, 1 with inflammatory myofibroblastic tumor-like, and 1 with myxoma-like tumor.	9	4	0	5	TPR-NTRK1(1), TPM3-NTRK1(1), NTRK1-unknown fusion partner (2)	0	ETV6-NTRK3 (4) and NTRK3-unknown fusion partner (1)	surgery first.patient was treated with chemotherapy and srugery after recurrence but it failed. then he was treated with crizotinib and had a good response(regression of pulmonary metastasis and stabilization of skeletal mets)	Not mentioned	2 alive with disease, 2 metastasis	1 patient	Not mentioned		1	1	1	1	1	1	1	1	1	1	1	1	0	0	0	0	0	1	1	1	1	1	0	0
Prevalence and clinico-genomic characteristics of patients with TRK fusion cancer in China	Xu, 2023	Not mentioned	China	Retrospective cohort	Both	58 years	Not mentioned	DNA-seq, RNA-seq, IHC	Not mentioned	thigh, lung, mediastinal lymph nodes, double lung metastasis, retroperitoneal area, and abdomen (numbers not mentioned)	571	49 with fibrosarcoma, 6 with IFS, 1 with RMS, 2 with Soft tissue sarcoma of the abdomen, 4 with Spindle cell sarcoma, 1 with Prostatic stromal tumor, 2 with Mucinous liposarcoma, 1 with leiomyosarcoma, and 505 not mentioned	17	8	0	9	TPM3-NTRK1(1), LMNA-NTRK1(6), IRF2BP2-NTRK1(1)	0	ETV6-NTRK3 (5), RBPMS-NTRK3 (1), MORF4L1-NTRK3 (1), PPFIA2-NTRK3 (1), MEF2A-NTRK3 (1)	crizotinib, larotrectinib	2/17 patients showed partial response to larotrectinib therapy	Not mentioned	Not mentioned	2 to 9 years		1	1	1	1	1	1	1	1	1	1	1	1	0	0	0	0	0	1	1	1	1	1	0	0
Abstract 2152: Targetable oncogenic fusions and other alterations in bone and soft-tissue tumors assessed by RNA and DNA-based next-generation sequencing in real-world experience	Dong, 2023	Not mentioned	Not mentioned	Prospective cohort	Not mentioned	Not mentioned	Not mentioned	RNA and DNA-based NGS	Not mentioned	Not mentioned	99	Not mentioned	1	0	0	1	0	0	ETV6-NTRK3 (1)	Not mentioned	Not mentioned	Not mentioned	Not mentioned	Not mentioned	data extracted from asbtract
Pan-TRK immunohistochemistry in gynaecological mesenchymal tumours: diagnostic implications and pitfalls	Moura, 2023	From 1993 to 2023	France	Case series	Not mentioned	Not mentioned	473/473 (100%)	IHC, RNA sequencing, FISH	Monomorphic spindle cells, herringbone, storiform, and haphazard patterns, perivascular and stromal hyalinization	Uterine corpus (324), Cervix (9), Vulva (2), Metastasis (16)	351	2 with COL1A1-PDGFB rearranged sarcoma, 50 with adenosarcoma, 122 with low-grade endometrial stromal sarcoma, 4 with low-grade endometrial stromal sarcoma with high-grade transformation, 46 with high-grade endometrial stromal sarcoma, 13 with uterine smooth muscle tumor of uncertain malignant potential, 19 with leiomyosarcoma, 73 with undifferentiated uterine sarcomas, 4 with inflammatory myofibr…	12	8	0	4	LMNA-NTRK1 (1), TPM3- NTRK1 (7)	0	SPECCL1-NTRK3 (2), EML4-NTRK3 (2)	not mentioned	Not mentioned	Not mentioned	Not mentioned	Not mentioned		1	1	1	1	1	1	1	1	1	1	1	1	0	0	0	0	1	1	1	1	1	1	0	1
Detection of Novel Tyrosine Kinase Fusion Genes as Potential Therapeutic Targets in Bone and Soft Tissue Sarcomas Using DNA/RNA-based Clinical Sequencing	Hasegawa, 2024	From 2017 to 2020	Germany	Retrospective descriptive	Both	48 years	33/82 (40.2%)	RT-PCR, NGS, IHC	Not mentioned	Not mentioned	82	10 with leiomyosarcoma, 6 with myxofibrosarcoma, 6 with myxoid liposarcoma, 5 with pleomorphic leiomyosarcoma, 4 with high-grade myxofibrosarcoma, 4 with malignant peripheral nerve sheath tumor, 4 with alveolar soft part sarcoma, 4 with high-grade sarcoma, not otherwise specified, 3 with dedifferentiated liposarcoma, 3 with osteosarcoma, 3 with dermatofibrosarcoma protuberans, 3 with synovial sar…	2	1	0	1	LMNA-NTRK1 (1)	0	STRN3-NTRK3 (1)	resection then larotrectinib followed by local resection (1), surgical excision (1)	Not mentioned	disease-free (2)	1 patient	9 months		1	0	0	1	1	1	0	1	1	1	1	1	0	0	0	0	0	1	1	1	1	0	0	0
Efficient Identification of Patients With NTRK Fusions Using a Supervised Tumor-Agnostic Approach	Hernandez, 2024	Not mentioned	Spain	Retrospective descriptive	Both	Not mentioned	Not mentioned	NGS and IHC	Not mentioned	Not mentioned	36	28 with gynecological sarcoma, 6 with GIST, 1 with infantile fibrosarcoma, 1 with MPNST	2	0	0	2	0	0	ETV6–NTRK3 (2)	not mentioned	Not mentioned	Not mentioned	Not mentioned	Not mentioned		1	0	0	1	1	1	0	1	1	1	1	1	0	0	0	0	0	1	1	1	1	0	0	0
Comprehensive clinicopathological, molecular, and methylation analysis of mesenchymal tumors with NTRK and other kinase gene aberrations	Klubíčková, 2024	Not mentioned	Czech Republic	Case series	Both	children: mean 24 months, adults: mean 47 year	11/22 (50%)	RNA, DNA sequencing	Five cases with low grade morphology exhibited were composed of uniform bland spindle cells. The mitotic activity was 2> mitoses per 10 high-power ﬁelds. Thick hyalinized vessels were present in some tumors. Three intermediate grade cases showed more polymorphism, hyperchromasia, and overlapping tumor cells, which were arranged fascicles or haphazardly. Some case were composed of myoid spindle ce…	Lower limb (4), upper limb (2), Retroperitoneum (3), Uterus (1), cervix (1), face (3), Hip (1), Duodenum (1), Scalp (1), Coccygeal region (1), Nuchal region (1), Orbit (1), Back (1).	22	11 with infantile fibrosarcoma, 5 with pattern with stromal and perivascular hyalinization (SPH), 2 with lipofibromatosis-like neural tumor, 1 with malignant peripheral nerve sheath tumor, 1 with myopericytoma-like tumor, 1 with LNT/SPH, and 1 with epitheloid/rhabdoid.	12	5	0	7	LMNA-NTRK1 (3), TPM3-NTRK1 (2)	0	EML4-NTRK3 (1), ETV6-NTRK3 (4), STRN-NTRK3 (1), RBPMS-NTRK3 (1)	surgical resection, chemotherapy, TRK inhibitor (entrectinib, larotrectinib, selpercatinib)	7/12 responded to therapy	Metastasis (1), death (1)	2 patients	10 to 130 months		1	1	1	1	1	1	1	1	1	0	1	1	0	0	0	0	0	1	1	1	1	0	0	0
Therapeutic benefit of larotrectinib over the historical standard of care in patients with locally advanced or metastatic infantile fibrosarcoma (EPI VITRAKVI study)	Orbach, 2024	From 2000 to 2022	France	Retrospective, observational, externally controlled study	Pediatrics	1.43 (±3) years	36/93 (38.7%)	NGS, FISH, RT-PCR	Infantile fibrosarcoma = spindle cell proliferation with a storiform pattern	limbs (57), Non-parameningeal head and neck (10), thoracic (9), Abdomen/pelvis (8), orbit (4), kidney (3), paraspinal (2)	93	Not mentioned	91	Not mentioned	Not mentioned	Not mentioned	Not mentioned	Not mentioned	Not mentioned	Larotrectinib vs. chemotherapy	infantile fibrosarcoma: complete response (49/51), partial response (41/51), stable disease (9/51); other sarcomas: data not provided		yes	Not mentioned		1	1	0	1	1	1	1	1	1	1	1	1	0	0	0	0	1	1	1	1	1	0	0	0
NTRK-rearranged spindle cell sarcoma of the uterine cervix with a novel NUMA1::NTRK1 fusion	Szalai, 2024	Not mentioned	Hungary	Case report	Adults	43 years	1/1 (100%)	NGS	Highly cellular tumor with monomorphic spindle cells, high mitotic activity (26 mitoses per 10 high-power fields), lymphovascular invasion	cervix (1)	1	1 with spindle cell sarcoma of uterine cervix	1	1	0	0	NUMA1-NTRK1 (1)	0	0	surgical removal, Adriamycin therapy, radiotherapy, potential immunotherapy and tyrosine kinase inhibitor (entrectinib) therapy for follow up	0/1 responded to therapy	Recurrence of right pelvic and retroperitoneal lymphadenopathy, secondary right iliac vein compression and thrombosis	1 patient	7 months		1	1	0	1	1	1	1	1	1	1	1	1	0	0	0	0	1	1	1	1	1	1	0	0
Abstract 6456: The utility of clinical sequencing in the diagnosis and treatment of soft tissue sarcomas; Real world data based on nation-wide database	Nakada, 2024	From 2019 to 2022	Japan	Retrospective cohort	Adults	Not mentioned	Not mentioned	NGS	Not mentioned	Not mentioned	1387	357 with leiomyosarcoma, 178 with dedifferentiated liposarcoma, 82 with undifferentiated pleomorphic sarcoma and 770 not mentioned	3	Not mentioned	Not mentioned	Not mentioned	Not mentioned	Not mentioned	Not mentioned	Not mentioned	Complete response in 5% and partial response in 26% of patients	Not mentioned	Not mentioned	Not mentioned	data extracted from asbtract
Clinical and molecular characteristics and targeted therapy of pediatric non-infantile fibrosarcoma NTRK rearrangement–related tumors.	Huang, 2024	Not mentioned	China	Retrospective descriptive	Pediatrics	Not mentioned	Not mentioned	NGS	Not mentioned	Not mentioned	28	Not mentioned	21	Not mentioned	Not mentioned	Not mentioned	SNIP1-NTRK1, CRCT1-NTRK1, ZBTB7B-NTRK1 (numbers of each fusion is not specified)	AGAP1-NTRK2 (number unknown)	SLC6A15-NTRK3 (number unknown)	TRK inhibitors	12/17 given TRK inhibitors, good response in patients who did not develop DDR, NOTCH, or TP53 pathway-related gene mutations	Not mentioned	Not mentioned	Not mentioned		1	1	1	1	1	1	1	1	1	1	1	1	0	0	0	0	1	1	1	1	1	0	0	0
Beyond Clinical Trials: Understanding Neurotrophic Tropomyosin Receptor Kinase Inhibitor Challenges and Efficacy in Real-World Pediatric Oncology	Vince, 2024	From 2018 to 2023	Brazil	Retrospective descriptive	Pediatrics	10.9 months	3/11 (27%)	NGS	Not mentioned	Not mentioned	11	8 with Infantile fibrosarcoma, 1 with Peripheral nerve sheath sarcoma, 1 with Low-grade soft tissue sarcoma, 1 with Mesenchymal spindle cell sarcoma/malignant peripheral nerve sheath tumor	11	7	0	4	TPM3-NTRK1(6), TPR-NTRK1(1)	0	ETV6-NTRK3 (4)	Larotrectinib	2/11 complete disapperance, 9/11 had partial reduction of tumor size, 3/11 have stable disease	10 of 11 alive, 3 with no evidence of disease, 8 alive with disease	Not mentioned	Median 25 months		1	1	1	1	1	1	1	1	1	1	1	1	0	0	0	0	1	1	1	1	1	0	0	0
Neurotrophic tyrosine receptor kinase gene fusions in adult and pediatric patients with solid tumors: a clinicogenomic biobank and record linkage study of expression frequency and patient characteristics from Finland	Zhang, 2024	From 2005 to 2019	Finland	Retrospective descriptive	Both	Not mentioned	Not mentioned	pan-TRK IHC, NGS	Not mentioned	Not mentioned	381	1 with fibrosarcoma, 1 with ewing's sarcoma, 379 sarcomas not mentioned	2	1	1	0	TPM3-NTRK1 (1)	LPPR1-NTRK2 (1)	0	chemotherapy and radiotherapy (1), surgery (1)	1/2 responded to therapy	Death (1)	Not mentioned	Up to 15 years in some patients		1	1	1	1	1	1	1	1	1	1	1	1	0	0	0	0	1	1	1	1	1	0	1	1
Case report: Adult NTRK-rearranged spindle cell neoplasms with TPM3-NTRK1 fusion in the pelvic	Cao, 2024	From 2022	China	Case report	Adults	50 years	1/1 (100%)	IHC, FISH, NGS	ovoid or spindle-shaped cells, arranged in a bundle or woven pattern	pelvis (1)	1	1 with spindle cell neoplasm	1	1	0	0	TPM3-NTRK1 (1)	0	0	imatinib 400mg then 50mg Sunitinib then total pelvic resection	0/1 responded to therapy	Death (1)	Not mentioned	Not mentioned		1	1	1	1	1	1	1	1	1	1	1	1	0	0	0	0	1	1	1	1	1	1	1	1
Uterine Sarcoma With EML4::NTRK3 Fusion: A Spectrum of Mesenchymal Neoplasms Harboring Actionable Gene Fusions	de Castro, 2024	Not mentioned	Brazil	Case report	Adults	43 years	Not mentioned	IHC, RNA-sequencing	moderately atypical spindle cells arranged in long fascicles reminiscent of fibrosarcoma	uterus (1)	1	1 with uterine sarcoma	1	0	0	1	0	0	EML4-NTRK3 (1)	not mentioned	Not mentioned	Not mentioned	Not mentioned	Not mentioned		1	1	1	1	1	1	1	1	1	1	1	1	0	0	0	0	1	1	1	1	1	1	1	1
Primary NTRK-rearranged Spindle Cell Neoplasm of the Gastrointestinal Tract: A Clinicopathological and Molecular Analysis of 8 Cases	Gao, 2024	Not mentioned	China	Retrospective descriptive	Both	Not mentioned	3/8 (37.5%)	IHC, NGS, FISH	4 tumors are low-grade, composed of haphazard or intertwining fascicles of spindle cells, with prominent interstitial collagen fibers , 4 high-grade sarcomas, consisting of sweeping fascicles of atypical spindle cells showing increased cellularity and brisk mitotic activity	Colon (3), small intestine (2), rectum (2), and stomach (1).	8	8 with spindle cell neoplasm	8	7	1	0	LMNA-NTRK1 (3), TPM3-NTRK1 (2)	TRN-NTRK2 (1)	0	larotrectinib alone (1), larotrectinib and surgery (1)	Not mentioned	Death (1)	Not mentioned	4 to 30 months		1	1	1	1	1	1	1	1	1	1	1	1	0	0	0	0	0	0	1	1	1	1	1	1
Uterine Neurotrophic Tyrosine Receptor Kinase Rearranged Spindle Cell Neoplasms: Three Cases of an Emerging Entity	Grant, 2024	Not mentioned	United Kingdom	Retrospective descriptive	Adults	36 years	3/3 (100%)	IHC, NGS	2 cases are atypical spindle cells in a myxoid stroma, 1 case with spindle cell tumor with giant cells and keloid-like material	uterus (3)	3	3 with uterine sarcoma	3	2	0	1	NTRK1-TMP3 (1), NTRK1-TPR (1)	0	SPECC1L-NTRK3 (1)	adjuvant radiotherapy and brachytherapy (1), surgery and doxorubicin (1), doxorubicin, Larotrectinib then second-genertaion TRK inhibitor (1)	adjuvant radiotherapy and brachytherapy then no disease progression (1), surgery and doxorubicin then died after 10 months (1), doxorubicin, Larotrectinib then second-genertaion TRK inhibitor then disease got better(1)	metastasis (2)	1 patient	10 to 41 months		1	1	1	1	1	1	1	1	1	1	1	1	0	0	0	0	0	0	1	1	1	1	1	1
Prevalence of neurotrophic tropomyosin receptor kinase (NTRK) fusion gene positivity in patients with solid tumors in Japan	Nakata, 2024	From June 2019 to February 2023	Japan	Retrospective descriptive	Both	Not mentioned	Not mentioned	NGS	Not mentioned	Not mentioned	2077	1 with angiomatoid fibrous histiocytoma, 106 with angiosarcoma, 187 with dedifferentiated liposarcoma, 30 with well-differentiated liposarcoma, 24 with Ewing sarcoma of soft tissue, 166 with gastrointestinal stromal tumor, 81 with not otherwise specified sarcoma, and 1482 with unclassified sarcoma.	19	12	0	7	LMNA-NTRK1 (5),TPM3-NTRK1 (3), KIRREL1- NTRK1 (1), MEF2D-NTRK1 (1), PEAB1- NTRK1 (1), PHF20-NTRK1 (1)	0	ETV6-NTRK3 (7)	not mentioned	Not mentioned	Not mentioned	Not mentioned	Not mentioned		1	1	1	1	1	1	1	1	1	1	1	1	0	0	0	0	1	1	1	1	1	1	0	1
Acquired NF2 mutation confers resistance to TRK inhibition in an ex vivo LMNA::NTRK1-rearranged soft-tissue sarcoma cell model	Chen, 2024	Not mentioned	Switzerland	Case report	Pediatrics	16 years	1/1 (100%)	IHC, NGS	Not mentioned	thigh (1)	1	1 with soft-tissue sarcoma	1	1	0	0	LMNA-NTRK1 (1)	0	0	TRK inhibitor entrectinib, surgical resection	1/1 responded to therapy	Drug adverse reactions, such as hallucinations	Not mentioned	Clinical follow-up at 3 months and 1 year showed continuous remission.		1	1	1	1	0	1	1	1	1	1	1	1	0	0	0	0	1	1	1	1	1	1	1	1
Clinical characteristics and treatment patterns of patients with NTRK fusion-positive solid tumors: A multisite cohort study at US academic cancer centers	Willis, 2024	From January 2012 to July 2023	United States of America	Retrospective descriptive	Both	Not mentioned	Not mentioned	NGS, RT-PCR, FISH	Not mentioned	Not mentioned	5	1 with liposarcoma, 1 with malignant peripheral nerve sheath tumor, 1 with infantile fibrosarcoma, 1 with Mullerian adenosarcoma, and 1 with uterine leiomyosarcoma.	5	Not mentioned	Not mentioned	Not mentioned	Not mentioned	Not mentioned	Not mentioned	TRK inhibitor, chemothrapy, radiation therapy	Not mentioned	Not mentioned	Not mentioned	Not mentioned		1	1	0	1	1	1	1	0	0	1	1	1	0	0	0	0	1	0	1	1	1	1	1	1
RAF1 gene fusions are recurrent driver events in infantile fibrosarcoma-like mesenchymal tumors	Motta, 2024	Not mentioned	Italy	Case series	Pediatrics	Not mentioned	Not mentioned	IHC, RNA sequencing	Not mentioned	Not mentioned	8	8 with infantile ﬁbrosarcoma-like mesenchymal tumor	2	2	0	0	NTRK1-unspecified fusion partner (2)	0	0	not mentioned	Not mentioned	Not mentioned	Not mentioned	Not mentioned		1	1	1	1	1	1	1	1	1	1	1	1	0	0	0	0	1	1	0	1	1	1	1	1
[truncated: 13 more columns]
